# Supplementary material for: Diagnostic issues in difficult-to-treat rheumatoid arthritis: a systematic literature review informing the EULAR recommendations for the management of difficult-to-treat rheumatoid arthritis
Source: PubMed Central journal article supplement — RMD Open. 2021 Jan 29;7(1):e001511. doi: 10.1136/rmdopen-2020-001511 (PMC7849901; doi:10.1136/rmdopen-2020-001511), 2021-01-29
Supplement: rmdopen-2020-001511supp002.pdf [file rmdopen-2020-001511supp002.pdf]

**Supplementary table 1.** Summary of studies on the confirmation of a diagnosis of RA

| Studies                                                        | Study design    | Study population (n)                                                                                                                                          | Phase of RA                    | Disease duration of RA (median) | Diagnostic test Description                                             | Cut-off (if applicable) | Reference standard                               | Time interval | Sensitivity, % (95% CI) | Specificity, % (95% CI) | Risk of bias*1 | Concerns regarding applicability*2 |
|----------------------------------------------------------------|-----------------|---------------------------------------------------------------------------------------------------------------------------------------------------------------|--------------------------------|---------------------------------|-------------------------------------------------------------------------|-------------------------|--------------------------------------------------|---------------|-------------------------|-------------------------|----------------|------------------------------------|
| Pedersen, 2014                                                 | Cross-sectional | RA (n=18), unspecified arthritis (n=1), ReA (n=1), PsA (n=1), JIA (n=1), arthralgia (n=16), OA (n=9), low back pain (n=1), gout (n=1), haemochromatosis (n=2) | Patients with self-reported RA | NA                              | ACR 1987 criteria                                                       | Yes vs no               | Clinical diagnosis according to a rheumatologist | NR            | 44 (22-69)              | 94 (81-99)              | L/L/L/L        | H/L/L                              |
|                                                                |                 |                                                                                                                                                               |                                |                                 | Adapted ACR 1987 criteria (GS synovitis, US erosions, ACPA)             | Yes vs no               |                                                  |               | 72 (47-90)              | 91 (77-98)              |                |                                    |
|                                                                |                 |                                                                                                                                                               |                                |                                 | Adapted ACR 1987 criteria (GS synovitis, US erosions, RF)               | Yes vs no               |                                                  |               | 72 (47-90)              | 87 (73-97)              |                |                                    |
|                                                                |                 |                                                                                                                                                               |                                |                                 | Adapted ACR 1987 criteria (GS synovitis, erosions on radiography, ACPA) | Yes vs no               |                                                  |               | 56 (31-79)              | 91 (77-98)              |                |                                    |
|                                                                |                 |                                                                                                                                                               |                                |                                 | Adapted ACR 1987 criteria (PD synovitis, US erosions, ACPA)             | Yes vs no               |                                                  |               | 39 (17-64)              | 100 (90-100)            |                |                                    |
|                                                                |                 |                                                                                                                                                               |                                |                                 | RAMRIS scale for synovitis (MCP joints 2-5)                             | ≥5                      |                                                  |               | 69 (39-91)              | 100 (73-100)            |                |                                    |
| RAMRIS scale for synovitis (combined wrist and MCP joints 2-5) | ≥10             | 62 (32-86)                                                                                                                                                    | 94 (73-100)                    |                                 |                                                                         |                         |                                                  |               |                         |                         |                |                                    |

ACPA: anti-*citruillinated protein* antibody; ACR: American College of Rheumatology; CI: confidence interval; GS: Gray scale; H: High; JIA: Juvenile idiopathic arthritis; L: Low; MCP: Metacarpophalangeal joint; n: number of patients; NA: Not applicable; NR: Not reported; OA: Osteoarthritis; PsA: Psoriatic arthritis; RA: rheumatoid arthritis; RAMRIS: Rheumatoid arthritis MRI scoring system; ReA: reactive arthritis; RF: Rheumatoid factor; PD: Power doppler; US: Ultrasound.

1. According to QUADAS-2, assessing 4 domains: Patient selection/Index test(s)/Reference standard/Flow and timing; 2. According to QUADAS-2, assessing 3 domains: Patient selection/Index test(s)/Reference standard
