# Supplementary material for: Diagnostic issues in difficult-to-treat rheumatoid arthritis: a systematic literature review informing the EULAR recommendations for the management of difficult-to-treat rheumatoid arthritis
Source: PubMed Central journal article supplement — RMD Open. 2021 Jan 29;7(1):e001511. doi: 10.1136/rmdopen-2020-001511 (PMC7849901; doi:10.1136/rmdopen-2020-001511), 2021-01-29
Supplement: rmdopen-2020-001511supp003.pdf [file rmdopen-2020-001511supp003.pdf]

Supplementary table 2. Summary of studies on the diagnosis of mimicking disease in RA patients

| Studies                 | Study design    | Study population (n)                                                                                                | Phase of RA                                    | Disease duration of RA (median) | Diagnostic test Description                                                                                                                                                                                   | Cut-off (if applicable)                                                                                                                 | Reference standard                                                                                          | Time interval                       | Sensitivity, % (95% CI)                      | Specificity, % (95% CI)                    | PPV, %                                       | NPV, %                                       | LR+                                            | LR-                                          | OR (95%CI, p-value)                                                                                                                                                     | Risk of bias*1 | Concerns regarding applicability*2 |
|-------------------------|-----------------|---------------------------------------------------------------------------------------------------------------------|------------------------------------------------|---------------------------------|---------------------------------------------------------------------------------------------------------------------------------------------------------------------------------------------------------------|-----------------------------------------------------------------------------------------------------------------------------------------|-------------------------------------------------------------------------------------------------------------|-------------------------------------|----------------------------------------------|--------------------------------------------|----------------------------------------------|----------------------------------------------|------------------------------------------------|----------------------------------------------|-------------------------------------------------------------------------------------------------------------------------------------------------------------------------|----------------|------------------------------------|
| Ghib, 2018 <sup>a</sup> | Case-control    | RA with FM (n=10); RA without FM but with VAS-pain $\geq$ 50 (n=10)                                                 | Established RA, suspected of mimicking disease | NR                              | MicroRNA-143                                                                                                                                                                                                  | >1.04                                                                                                                                   | FM: NR                                                                                                      | NR                                  | 90                                           | 70                                         |                                              |                                              |                                                |                                              |                                                                                                                                                                         | H/H/U/H        | L/L/U                              |
| Fan, 2016               | Cross-sectional | RA (n=279)                                                                                                          | Established RA, suspected of mimicking disease | NR                              | Fibromyalgia Rapid Screening Tool (FIRST)                                                                                                                                                                     | $\geq$ 5/6                                                                                                                              | 1990 ACR Fibromyalgia criteria<br>Rheumatologist's opinion                                                  | Same time point                     | 71.4 (41.9-91.6)<br>82.6 (61.2-95.0)         | 84.4 (79.4-88.6)<br>87.5 (82.7-91.3)       | 20.0 (10.0-33.7)<br>38.0 (24.7-52.8)         | 98.2 (95.4-99.5)<br>98.2 (95.4-99.5)         |                                                |                                              |                                                                                                                                                                         | L/H/L/U        | L/L/L                              |
| Salaffi, 2018           | Cross-sectional | RA with FM (n=43); RA without FM (n=249)                                                                            | Established RA, suspected of mimicking disease | 8Y                              | Derived DAS28 patient-reported components (DAS28-P): calculated by rearranging the components of the DAS28-ESR into the following formula: $(0.56 \times \text{TJC} + 0.014 \times \text{GH}) / \text{DAS28}$ | 0.6312                                                                                                                                  | ACR 2010 Fibromyalgia criteria                                                                              | NR                                  | 81.40 (66.6-91.6)                            | 80.32 (74.8-85.1)                          |                                              |                                              | 4.14 (3.5-4.8)                                 | 0.23 (0.1-0.5)                               |                                                                                                                                                                         | L/H/U/L        | L/L/L                              |
| Sato, 2012              | Cross-sectional | Flare of RA (n=18), non-infectious complications (n=23), non-bacterial infection (n=15), bacterial infection (n=62) | Established RA, suspected of mimicking disease | NR                              | Procalcitonin levels<br>Procalcitonin levels<br>WBC count<br>CRP<br>ESR<br>Procalcitonin and WBC                                                                                                              | $\geq$ 0.5ng/ml<br>$\geq$ 0.2ng/ml<br>>8500/mm <sup>3</sup><br>$\geq$ 0.3 mg/dl<br>>15mm/h<br>$\geq$ 0.5ng/ml and >8500/mm <sup>3</sup> | Bacterial infection: symptoms, bacterial culture tests, imaging studies, and response to antibiotic therapy | Within period of hospital admission | 25.8<br>33.9<br>66.1<br>69.8<br>98.1<br>21.0 | 98.2<br>89.3<br>58.9<br>5.4<br>8.9<br>98.2 | 94.1<br>77.8<br>64.1<br>63.1<br>56.4<br>92.9 | 54.5<br>54.9<br>61.1<br>60.0<br>80.0<br>52.9 | 14.33<br>3.17<br>1.61<br>0.03<br>0.02<br>11.67 | 1.32<br>1.35<br>1.74<br>1.69<br>4.68<br>1.24 | 19.13 (2.44-149.78, 0.005)<br>4.27 (1.58-11.57, 0.004)<br>2.80 (1.33-5.92, 0.007)<br>1.70 (0.27-10.55, 0.570)<br>5.17 (0.56-48.03, 0.149)<br>14.59 (1.84-115.65, 0.011) | L/L/L/L        | L/L/L                              |

ACR: American College of Rheumatology; CI: confidence interval; CRP: C-reactive protein; DAS28: disease activity score assessing 28 joints; ESR: erythrocyte sedimentation rate; EULAR: European League Against Rheumatism; FM: Fibromyalgia; GH: global health; H: High; L: Low; LR+: Positive likelihood ratio; LR-: Negative likelihood ratio; MCP: Metacarpophalangeal joint; n: number of patients; NR: Not reported; OR: Odds ratio; RA: rheumatoid arthritis; TJC: tender joint count; U: Uncertain; WBC: White blood cell count; <sup>a</sup>: Conference abstract.

1. According to QUADAS-2, assessing 4 domains: Patient selection/Index text(s)/Reference standard/Flow and timing; 2. According to QUADAS-2, assessing 3 domains: Patient selection/Index text(s)/Reference standard
