# Supplementary material for: Diagnostic issues in difficult-to-treat rheumatoid arthritis: a systematic literature review informing the EULAR recommendations for the management of difficult-to-treat rheumatoid arthritis
Source: PubMed Central journal article supplement — RMD Open. 2021 Jan 29;7(1):e001511. doi: 10.1136/rmdopen-2020-001511 (PMC7849901; doi:10.1136/rmdopen-2020-001511), 2021-01-29
Supplement: rmdopen-2020-001511supp004.pdf [file rmdopen-2020-001511supp004.pdf]

Supplementary table 3. Summary of studies on the assessment of inflammatory activity at patient level

| Studies                             | Study design                       | Study population (n)                               | Disease activity (mean)                                              | Disease duration (mean) | Diagnostic test Description                         | Cut-off (if applicable) | Reference standard Description | Cut-off (if applicable) | Time interval   | Sensitivity, % (95% CI) | Specificity, % (95% CI) | PPV, % (95% CI) | NPV, % (95% CI) | OR (95%CI, p value)                                                         | Correlation coefficient (95% CI, p-)                                                                                                                                                                                                                     | Other    | Risk of bias <sup>41</sup> | Risk of bias of individual studies | Concerns regarding applicability <sup>43</sup> |
|-------------------------------------|------------------------------------|----------------------------------------------------|----------------------------------------------------------------------|-------------------------|-----------------------------------------------------|-------------------------|--------------------------------|-------------------------|-----------------|-------------------------|-------------------------|-----------------|-----------------|-----------------------------------------------------------------------------|----------------------------------------------------------------------------------------------------------------------------------------------------------------------------------------------------------------------------------------------------------|----------|----------------------------|------------------------------------|------------------------------------------------|
| <b>Biomarker vs composite index</b> |                                    |                                                    |                                                                      |                         |                                                     |                         |                                |                         |                 |                         |                         |                 |                 |                                                                             |                                                                                                                                                                                                                                                          |          |                            |                                    |                                                |
| Algergawy, 2013                     | Case control                       | Patients suspected of and diagnosed with RA (n=40) | NR                                                                   | NR                      | Cartilage oligomeric matrix protein                 | Positive                | DAS                            | Moderate to high        | Same time point | 71.0                    | 88.9                    | 95.7            | 47.1            |                                                                             |                                                                                                                                                                                                                                                          |          | H/H/H/L                    |                                    | H/L/H                                          |
|                                     |                                    |                                                    |                                                                      |                         | ACPA                                                | Positive                | DAS categories                 | Low vs moderate vs high | Same time point |                         |                         |                 |                 |                                                                             |                                                                                                                                                                                                                                                          | p<0.001  |                            |                                    |                                                |
| Andres Cerezo, 2017                 | Cross-sectional                    | Patients with active RA (n=40)                     | DAS28 4.39 (1.19)                                                    | 6.72Y                   | Synovial fluid S100A11                              | NA                      | DAS28                          | NA                      | NR              |                         |                         |                 |                 | r=0.350, p=0.027; r=0.414, p=0.011, adjusted by age, BMI, ACPA              |                                                                                                                                                                                                                                                          | H/H/U/H  |                            | H/L/H                              |                                                |
| Avouac, 2014                        | Cross-sectional                    | RA patients (n=236)                                | DAS28 57 (24-87), median (range)                                     | NR                      | High-sensitivity cardiac troponin (HS-cTnT)         | >14ng/L                 | DAS28-CRP                      | >5.1                    | Same time point | 0.11 (1.6-35.5, -)      |                         | 21.2            | 94.6            | r=0.2; p=0.020; Adjusted by all variables with a p value ≤0.1 as covariates |                                                                                                                                                                                                                                                          | L/U/U/L  |                            | H/L/H                              |                                                |
| Bae, 2018                           | SLR: 14 (quantitative analysis: 8) | RA patients (n=638)                                | NR                                                                   | NR                      | miR-146a                                            | NA                      | DAS28                          | NA                      | NR              |                         |                         |                 |                 | r=0.434 (95%CI 0.163-0.798, p=0.148)                                        | Circulating and synovial tissue/fluid miR-146a levels are high in patients with RA, and circulating miR-146a levels positively correlate with ESR.                                                                                                       | High     | NR                         | -                                  |                                                |
| Bustos Rivera-Bahena, 2016          | Cross-sectional                    | RA patients (n=121)                                | DAS28 4.7                                                            | 7.25Y                   | Leptin                                              | NA                      | DAS28                          | NA                      | Same day        |                         |                         |                 |                 | r=0.513, p<0.0001                                                           |                                                                                                                                                                                                                                                          | L/U/L/L  |                            | H/L/H                              |                                                |
|                                     |                                    |                                                    |                                                                      |                         | Resistin                                            | NA                      | DAS28                          | NA                      | Same day        |                         |                         |                 |                 | r=0.403, p<0.0001                                                           |                                                                                                                                                                                                                                                          |          |                            |                                    |                                                |
|                                     |                                    |                                                    |                                                                      |                         | Adiponectin                                         | NA                      | DAS28                          | NA                      | Same day        |                         |                         |                 |                 | r=-0.151, p>0.05                                                            |                                                                                                                                                                                                                                                          |          |                            |                                    |                                                |
|                                     |                                    |                                                    |                                                                      |                         | IL-6                                                | NA                      | DAS28                          | NA                      | Same day        |                         |                         |                 |                 | r=0.313, p<0.005                                                            |                                                                                                                                                                                                                                                          |          |                            |                                    |                                                |
|                                     |                                    |                                                    |                                                                      |                         | IL-17                                               | NA                      | DAS28                          | NA                      | Same day        |                         |                         |                 |                 | r=0.373, p<0.0001                                                           |                                                                                                                                                                                                                                                          |          |                            |                                    |                                                |
|                                     |                                    |                                                    |                                                                      |                         | TNFα                                                | NA                      | DAS28                          | NA                      | Same day        |                         |                         |                 |                 | r=0.213, p<0.05                                                             |                                                                                                                                                                                                                                                          |          |                            |                                    |                                                |
| do Prado, 2016                      | Cross-sectional                    | RA patients (n=64)                                 | DAS28-ESR 4.02                                                       | 5Y                      | IL-2                                                | NA                      | DAS28-ESR                      | NA                      | Same day        |                         |                         |                 |                 | r=-0.08 (-0.33-0.17), ns                                                    |                                                                                                                                                                                                                                                          | L/L/L/L  |                            | H/L/L                              |                                                |
|                                     |                                    |                                                    |                                                                      |                         | IL-4                                                | NA                      | DAS28-ESR                      | NA                      | Same day        |                         |                         |                 |                 | r=-0.004 (-0.26-0.25), ns                                                   |                                                                                                                                                                                                                                                          |          |                            |                                    |                                                |
|                                     |                                    |                                                    |                                                                      |                         | IL-6                                                | NA                      | DAS28-ESR                      | NA                      | Same day        |                         |                         |                 |                 | r=0.31 (0.07-0.52), p<0.01                                                  |                                                                                                                                                                                                                                                          |          |                            |                                    |                                                |
|                                     |                                    |                                                    |                                                                      |                         | IL-10                                               | NA                      | DAS28-ESR                      | NA                      | Same day        |                         |                         |                 |                 | r=-0.11 (-0.37-0.14), ns                                                    |                                                                                                                                                                                                                                                          |          |                            |                                    |                                                |
|                                     |                                    |                                                    |                                                                      |                         | TNF                                                 | NA                      | DAS28-ESR                      | NA                      | Same day        |                         |                         |                 |                 | r=-0.01 (-0.27-0.23), ns                                                    |                                                                                                                                                                                                                                                          |          |                            |                                    |                                                |
|                                     |                                    |                                                    |                                                                      |                         | IFN                                                 | NA                      | DAS28-ESR                      | NA                      | Same day        |                         |                         |                 |                 | r=-0.09 (-0.34-0.17), ns                                                    |                                                                                                                                                                                                                                                          |          |                            |                                    |                                                |
|                                     |                                    |                                                    |                                                                      |                         | VEGF                                                | NA                      | DAS28-ESR                      | NA                      | Same day        |                         |                         |                 |                 | r=0.18 (-0.77-0.41), ns                                                     |                                                                                                                                                                                                                                                          |          |                            |                                    |                                                |
| Gunaydin, 2006                      | Cross-sectional                    | RA patients (n=50)                                 | DAS28 5.4 (1.17)                                                     | 10Y                     | Serum leptin level                                  | NA                      | DAS28                          | NA                      | Same day        |                         |                         |                 |                 | r=-0.111, p=0.442                                                           |                                                                                                                                                                                                                                                          | L/U/U/L  |                            | H/L/H                              |                                                |
| Ha, 2014                            | Cross-sectional                    | RA patients (n=69)                                 | DAS28 3.04 (1.58)                                                    | 5.3Y                    | Leukine-rich alpha-2 glycoprotein (LRG) serum level | NA                      | DAS28                          | NA                      | Same day        |                         |                         |                 |                 | r=0.671, p<0.001                                                            |                                                                                                                                                                                                                                                          | L/U/L/L  |                            | H/L/H                              |                                                |
| Johnson, 2018                       | SLR: 22 (quantitative analysis: 8) | RA patients (n=3879)                               | DAS28 3.2-6.0, except for one study of patients in remission (range) | NR                      | MBDA score                                          | NA                      | DAS28-CRP                      | NA                      | NR              |                         |                         |                 |                 | r=0.41 (95%CI 0.36-0.46)                                                    | The MBDA demonstrates moderate convergent validity with DAS28-CRP and DAS28-ESR, but weaker correlations with SDAI, CDAI, and RAPID3. While it appears to complement existing RA disease activity measures, further assessment of the MBDA's performance | Moderate | Low                        | -                                  |                                                |
|                                     |                                    |                                                    |                                                                      |                         | MBDA score                                          | NA                      | DAS28-ESR                      | NA                      | NR              |                         |                         |                 |                 | r=0.48 (95%CI 0.38-0.58)                                                    |                                                                                                                                                                                                                                                          |          |                            |                                    |                                                |
|                                     |                                    |                                                    |                                                                      |                         | MBDA score                                          | NA                      | SDAI                           | NA                      | NR              |                         |                         |                 |                 | r=0.35 (95%CI 0.26-0.43)                                                    |                                                                                                                                                                                                                                                          |          |                            |                                    |                                                |

| Author          | Study Design    | Population                            | Primary Outcome                                    | Secondary Outcome | Marker            | Comparison | Result    | Significance | Notes    |                          |                            |
|-----------------|-----------------|---------------------------------------|----------------------------------------------------|-------------------|-------------------|------------|-----------|--------------|----------|--------------------------|----------------------------|
| Kawashiri, 2011 | Cross-sectional | RA patients (n=22)                    | DAS28 5.69; SDAI 30.6; CDAI 28.3                   | 2.3Y              | MBDA score        | NA         | CDAI      | NA           | NR       | r=0.26 (95%CI 0.19-0.33) | characteristics warranted. |
|                 |                 |                                       |                                                    |                   | VEGF              | NA         | DAS28     | NA           | Same day | r=0.59, p<0.01           |                            |
|                 |                 |                                       |                                                    |                   | VEGF              | NA         | SDAI      | NA           | Same day | r=0.54, p<0.05           |                            |
|                 |                 |                                       |                                                    |                   | VEGF              | NA         | CDAI      | NA           | Same day | r=0.51, p<0.05           |                            |
|                 |                 |                                       |                                                    |                   | MMP-3             | NA         | DAS28     | NA           | Same day | r=0.61, p<0.01           |                            |
|                 |                 |                                       |                                                    |                   | MMP-3             | NA         | SDAI      | NA           | Same day | r=0.58, p<0.01           |                            |
|                 |                 |                                       |                                                    |                   | MMP-3             | NA         | CDAI      | NA           | Same day | r=0.55, p<0.05           |                            |
|                 |                 |                                       |                                                    |                   | MMP-9             | NA         | DAS28     | NA           | Same day | r=0.27, ns               |                            |
|                 |                 |                                       |                                                    |                   | MMP-9             | NA         | SDAI      | NA           | Same day | r=0.23, ns               |                            |
|                 |                 |                                       |                                                    |                   | MMP-9             | NA         | CDAI      | NA           | Same day | r=0.18, ns               |                            |
| Kurosaka, 2010  | Cross-sectional | RA patients (n=70)                    | DAS28-CRP 3.324                                    | 4.43Y             | TIMP-1            | NA         | DAS28     | NA           | Same day | r=0.39, ns               |                            |
|                 |                 |                                       |                                                    |                   | TIMP-1            | NA         | SDAI      | NA           | Same day | r=0.42, ns               |                            |
|                 |                 |                                       |                                                    |                   | TIMP-1            | NA         | CDAI      | NA           | Same day | r=0.37, ns               |                            |
|                 |                 |                                       |                                                    |                   | VEGF serum level  | NA         | DAS28-CRP | NA           | NR       | r=0.6527, p<0.0001       |                            |
|                 |                 |                                       |                                                    |                   | ANG-1 serum level | NA         | DAS28-CRP | NA           | NR       | r=0.2435, p=0.0489       |                            |
|                 |                 |                                       |                                                    |                   | ANG-2 serum level | NA         | DAS28-CRP | NA           | NR       | r=0.2147, p=0.0743       |                            |
| Lee, 2007       | Cross-sectional | RA patients (n=50)                    | DAS28 3.69                                         | 15.5M             | Leptin            | NA         | DAS28     | NA           | NR       | r=0.363, p<0.05          |                            |
|                 |                 |                                       |                                                    |                   | Serum IL-17A      | NA         | DAS28     | NA           | NR       | r=0.556, p=0.001         |                            |
| Metawi, 2011    | Cross-sectional | RA patients with knee effusion (n=30) | DAS28 4.8                                          | 9.5Y              | Synovial IL-17A   | NA         | DAS28     | NA           | NR       | r=0.392, p=0.032         |                            |
|                 |                 |                                       |                                                    |                   | IL-2              | NA         | DAS28-ESR | NA           | Same day | r=-0.005, ns             |                            |
| Milman, 2010    | Cross-sectional | RA patients (n=47)                    | DAS28-ESR 4.3; DAS28-CRP 4.4; SDAI 27.9; CDAI 27.1 | 13.7Y             | IL-2              | NA         | DAS28-ESR | NA           | Same day | r=0.021, ns              |                            |
|                 |                 |                                       |                                                    |                   | IL-2              | NA         | DAS28-CRP | NA           | Same day | r=0.003, ns              |                            |
|                 |                 |                                       |                                                    |                   | IL-2              | NA         | SDAI      | NA           | Same day | r=0.024, ns              |                            |
|                 |                 |                                       |                                                    |                   | IL-4              | NA         | DAS28-ESR | NA           | Same day | r=0.191, ns              |                            |
|                 |                 |                                       |                                                    |                   | IL-4              | NA         | DAS28-CRP | NA           | Same day | r=0.256, ns              |                            |
|                 |                 |                                       |                                                    |                   | IL-4              | NA         | CDAI      | NA           | Same day | r=0.175, ns              |                            |
|                 |                 |                                       |                                                    |                   | IL-4              | NA         | SDAI      | NA           | Same day | r=0.222, ns              |                            |
|                 |                 |                                       |                                                    |                   | IL-6              | NA         | DAS28-ESR | NA           | Same day | r=0.409, p=0.005         |                            |
|                 |                 |                                       |                                                    |                   | IL-6              | NA         | DAS28-CRP | NA           | Same day | r=0.378, p=0.011         |                            |
|                 |                 |                                       |                                                    |                   | IL-6              | NA         | CDAI      | NA           | Same day | r=0.312, p=0.033         |                            |
|                 |                 |                                       |                                                    |                   | IL-6              | NA         | SDAI      | NA           | Same day | r=0.310, p=0.039         |                            |
|                 |                 |                                       |                                                    |                   | IL-8              | NA         | DAS28-ESR | NA           | Same day | r=0.234, ns              |                            |
|                 |                 |                                       |                                                    |                   | IL-8              | NA         | DAS28-CRP | NA           | Same day | r=0.276, ns              |                            |
|                 |                 |                                       |                                                    |                   | IL-8              | NA         | CDAI      | NA           | Same day | r=0.250, ns              |                            |
|                 |                 |                                       |                                                    |                   | IL-8              | NA         | SDAI      | NA           | Same day | r=0.257, ns              |                            |
|                 |                 |                                       |                                                    |                   | IL-10             | NA         | DAS28-ESR | NA           | Same day | r=0.226, ns              |                            |
|                 |                 |                                       |                                                    |                   | IL-10             | NA         | DAS28-CRP | NA           | Same day | r=0.256, ns              |                            |
|                 |                 |                                       |                                                    |                   | IL-10             | NA         | CDAI      | NA           | Same day | r=0.212, ns              |                            |
|                 |                 |                                       |                                                    |                   | IL-10             | NA         | SDAI      | NA           | Same day | r=0.219, ns              |                            |
|                 |                 |                                       |                                                    |                   | VEGF              | NA         | DAS28-ESR | NA           | Same day | r=0.142, ns              |                            |
| VEGF            | NA              | DAS28-CRP                             | NA                                                 | Same day          | r=0.241, ns       |            |           |              |          |                          |                            |
| VEGF            | NA              | CDAI                                  | NA                                                 | Same day          | r=0.228, ns       |            |           |              |          |                          |                            |
| VEGF            | NA              | SDAI                                  | NA                                                 | Same day          | r=0.275, ns       |            |           |              |          |                          |                            |
| INF-Y           | NA              | DAS28-ESR                             | NA                                                 | Same day          | r=0.252, ns       |            |           |              |          |                          |                            |
| INF-Y           | NA              | DAS28-CRP                             | NA                                                 | Same day          | r=0.309, p=0.039  |            |           |              |          |                          |                            |
| INF-Y           | NA              | CDAI                                  | NA                                                 | Same day          | r=0.269, ns       |            |           |              |          |                          |                            |
| INF-Y           | NA              | SDAI                                  | NA                                                 | Same day          | r=0.301, p=0.045  |            |           |              |          |                          |                            |
| INF-A           | NA              | DAS28-ESR                             | NA                                                 | Same day          | r=-0.009, ns      |            |           |              |          |                          |                            |
| INF-A           | NA              | DAS28-CRP                             | NA                                                 | Same day          | r=0.018, ns       |            |           |              |          |                          |                            |
| INF-A           | NA              | CDAI                                  | NA                                                 | Same day          | r=0.034, ns       |            |           |              |          |                          |                            |

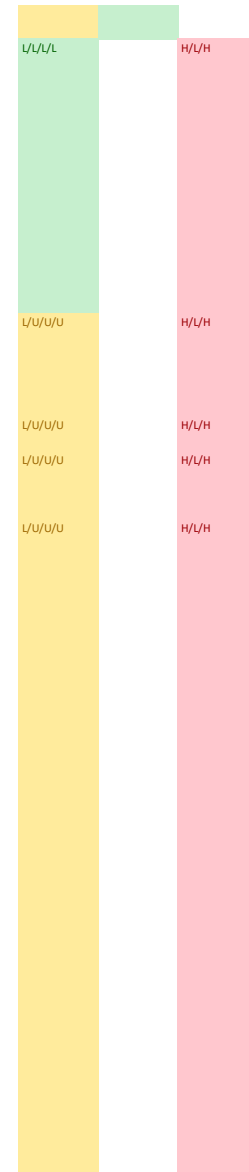



|                                   |                                           |                     |                      |            |                                                        |             |           |      |    |      |      |                                       |          |       |
|-----------------------------------|-------------------------------------------|---------------------|----------------------|------------|--------------------------------------------------------|-------------|-----------|------|----|------|------|---------------------------------------|----------|-------|
| Shah, 2014                        | Cross-sectional                           | RA patients (n=58)  | DAS28 5.3            | 5Y, median | Serum ACPA                                             | NA          | DAS28     | NA   | NR |      |      | r=-0.126, p=0.348                     | L/U/U/U  | H/L/H |
| Skacelova, 2017                   | Cross-sectional                           | RA patients (n=92)  | DAS28 3.74           | 15.66Y     | MMP-3                                                  | NA          | DAS28     | NA   | NR |      |      | r=0.301, p<0.05                       | L/U/U/U  | H/L/H |
| Sockaling, 2009                   | Cross-sectional                           | RA patients (n=51)  | DAS28 4.11, median   | NR         | Serum ACPA                                             | NA          | DAS28     | NA   | NR |      |      | No correlation                        | L/U/U/U  | H/L/H |
| Targońska-Stepniak, 2008          | Cross-sectional                           | RA patients (n=37)  | DAS28 4.8            | 136.5M     | Serum leptin (all patients)                            | NA          | DAS28     | NA   | NR |      |      | No correlation                        | L/U/U/U  | H/L/H |
|                                   |                                           |                     |                      |            | Serum leptin (RA duration >10Y)                        | NA          | DAS28     | NA   | NR |      |      | r=0.68, p=0.002                       |          |       |
|                                   |                                           |                     |                      |            | Serum leptin (RA duration <10Y)                        | NA          | DAS28     | NA   | NR |      |      | r=0.97, p=0.34                        |          |       |
| Tekeoğlu, 2016                    | Cross-sectional                           | RA patients (n=102) | DAS28 3.50           | 40.85M     | Platelet count                                         | NA          | DAS28     | NA   | NR |      |      | r=0.299, p<0.001                      | L/U/U/L  | H/L/H |
|                                   |                                           |                     |                      |            | Neutrophil lymphocyte ratio (NLR)                      | NA          | DAS28     | NA   | NR |      |      | r=0.192, p=0.05                       |          |       |
|                                   |                                           |                     |                      |            | Mean platelet volume (MPV)                             | NA          | DAS28     | NA   | NR |      |      | r=-0.316, p=0.055, p=0.124            |          |       |
|                                   |                                           |                     |                      |            | Platelet distribution width (PDW)                      | NA          | DAS28     | NA   | NR |      |      | r=-0.055, p=0.124                     |          |       |
| Tuncer, 2019                      | Cross-sectional                           | RA patients (n=59)  | DAS28 3.94           | 9.0Y       | MMP-3                                                  | 18.73 ng/ml | DAS28     | 3.2  | NR | 93.2 | 82.8 | r=0.674, p<0.001                      | L/U/U/U  | H/L/H |
| Uslu, 2015                        | Cross-sectional                           | RA patients (n=104) | NR                   | NR         | Neutrophil-lymphocyte ratio                            | NA          | DAS28     | NA   | NR |      |      | r=0.345, p<0.0001                     | L/U/U/U  | H/L/H |
|                                   |                                           |                     |                      |            | Platelet-lymphocyte ratio                              | NA          | DAS28     | NA   | NR |      |      | r=0.352, p<0.0001                     |          |       |
| Valle, 2009                       | Cross-sectional                           | RA patients (n=41)  | DAS28 5.87           | 9.6Y       | soluble TNF $\alpha$ receptor type I (sTNFRI) level    | NA          | DAS28     | NA   | NR |      |      | r=0.219, ns                           | L/U/U/L  | H/L/H |
|                                   |                                           |                     |                      |            | soluble TNF $\alpha$ receptor type II (sTNFRII) level  | NA          | DAS28     | NA   | NR |      |      | r=0.375, p=0.017                      |          |       |
| Vanichapuntu, 2010                | Cross-sectional                           | RA patients (n=125) | DAS28 3.95           | 38.2M      | ACPA                                                   | 25 units/ml | DAS28     | >2.6 | NR |      |      | r=0.121, p=0.180                      | L/U/U/U  | H/L/H |
|                                   |                                           |                     |                      |            | RF                                                     | 15 IU/ml    | DAS28     | >2.6 | NR |      |      | r=0.265, p=0.003                      |          |       |
| Yildirim, 2004                    | Cross-sectional                           | RA patients (n=47)  | DAS28 5.2            | 10.8Y      | Haptoglobin                                            | NA          | DAS28     | NA   | NR |      |      | r=0.331, p<0.05                       | L/U/U/U  | H/L/H |
|                                   |                                           |                     |                      |            | Ferritin                                               | NA          | DAS28     | NA   | NR |      |      | r=0.299, p<0.05                       |          |       |
|                                   |                                           |                     |                      |            | Fibrinogen                                             | NA          | DAS28     | NA   | NR |      |      | r=0.373, p<0.01                       |          |       |
| Yuan, 2019                        | Cross-sectional                           | RA patients (n=230) | NR                   | NR         | mRNA levels of IL-37                                   | NA          | DAS28-ESR | NA   | NR |      |      | r=0.641, p<0.001                      | L/U/U/U  | H/L/H |
| Zengin, 2018                      | Cross-sectional                           | RA patients (n=317) | NR                   | NR         | Neutrophil to lymphocyte ratio (NLR)                   | NA          | DAS28     | NA   | NR |      |      | r=0.33, p<0.001                       | L/U/U/U  | H/L/H |
|                                   |                                           |                     |                      |            | Platelet to lymphocyte ratio (PLR)                     | NA          | DAS28     | NA   | NR |      |      | r=0.22, p<0.001                       |          |       |
| Zhang, 2019                       | SLR: 7 studies (quantitative analysis: 7) | RA patients (n=NR)  | NR                   | NR         | IL-17                                                  | NA          | DAS28     | NA   | NR |      |      | Pooled r=0.335 (0.173-0.496), p<0.001 | Moderate | Low   |
| <b>Imaging vs composite index</b> |                                           |                     |                      |            |                                                        |             |           |      |    |      |      |                                       |          |       |
| Besselink, 2018                   | Cross-sectional                           | RA patients (n=50)  | DAS28-ESR 3.9 (1.20) | NR         | Optical spectral transmission (OST) model (both hands) | NA          | DAS28     | NA   | NR |      |      | r=0.06 (95CI-0.26-0.36, p=0.71)       | L/H/L/L  | H/L/L |

Conclusion: Circulating IL-17 level is significantly elevated in inflammatory arthritis and is related to the disease activity of AS and RA, suggesting that it plays an important role in the pathogenesis and progression of inflammatory arthritis (especially in AS and RA).

| Author                     | Study Design    | Population                                                             | Age                              | Gender | Measures                                                                                                                                                                                                                                                                                                                                                                                                                                                                                                                                                                                                                                                                | NA | CDAI  | NA | NR       | Correlation       | Color 1 | Color 2 |
|----------------------------|-----------------|------------------------------------------------------------------------|----------------------------------|--------|-------------------------------------------------------------------------------------------------------------------------------------------------------------------------------------------------------------------------------------------------------------------------------------------------------------------------------------------------------------------------------------------------------------------------------------------------------------------------------------------------------------------------------------------------------------------------------------------------------------------------------------------------------------------------|----|-------|----|----------|-------------------|---------|---------|
| Ceponis, 2014              | Cross-sectional | Established RA patients (n=46)                                         | CDAI 15.9                        | 16.6Y  | US: total Synovial Hypertrophy score (tSH), range 0-135: Synovial hypertrophy (B-mode examination) was scored on a semiquantitative scale (where 0=absence, 1=mild, 2=moderate, and 3=severe. orsal and palmar joint regions and ulnar and radial aspects of the interphalangeal and second through fifth PIP joints; dorsaland palmar joint regions of the first through fifth and ulnar and radial aspects of the second and fifth MCP joints; and dorsal and volar joint regions and radial and ulnar aspects of the wrist (distal radioulnar, midcarpal, radiocarpal, and ulnar-carpal) joints were examined in long (sagittal plane) and short (axial plane) axes. | NA | CDAI  | NA | NR       | r=0.4612, p<0.005 | L/U/L/U | H/L/H   |
|                            |                 |                                                                        |                                  |        | US: total Synovial PD score (tSPD)                                                                                                                                                                                                                                                                                                                                                                                                                                                                                                                                                                                                                                      | NA | CDAI  | NA | NR       | r=0.5043, p<0.005 |         |         |
|                            |                 |                                                                        |                                  |        | US: Sonographic effusion                                                                                                                                                                                                                                                                                                                                                                                                                                                                                                                                                                                                                                                | NA | CDAI  | NA | NR       | r=0.3627, p<0.01  |         |         |
| Ciurtin, 2017 <sup>a</sup> | Cross-sectional | RA patients who were referred for examination of hands and feet (n=46) | NR                               | NR     | US: PD scores of hands and feet joints                                                                                                                                                                                                                                                                                                                                                                                                                                                                                                                                                                                                                                  | NA | DAS28 | NA | NR       | r=0.14, p=0.02    | L/U/L/U | L/L/L   |
| Filer, 2017 <sup>a</sup>   | Cross-sectional | RA patients with at least 1 joint amenable to biopsy (n=15)            | NR                               | NR     | US: PD score of MTP joints                                                                                                                                                                                                                                                                                                                                                                                                                                                                                                                                                                                                                                              | NA | DAS28 | NA | NR       | r=0.03, p=0.09    |         |         |
|                            |                 |                                                                        |                                  |        | GS US (12 joint indices for MCP and wrist joints), score 0-3                                                                                                                                                                                                                                                                                                                                                                                                                                                                                                                                                                                                            | NA | DAS28 | NA | NR       | r=0.70, p<0.05    | L/U/L/L | H/L/L   |
|                            |                 |                                                                        |                                  |        | PD US (12 joint indices for MCP and wrist joints), score 0-3                                                                                                                                                                                                                                                                                                                                                                                                                                                                                                                                                                                                            | NA | DAS28 | NA | NR       | r=0.66, p<0.05    |         |         |
| Kawashiri, 2011            | Cross-sectional | RA patients (n=22)                                                     | DAS28 5.69; SDAI 30.6; CDAI 28.3 | 2.3Y   | US: PD in 12 joints, sum score (bilateral elbows (anterior and posterior recess), wrists (dorsal and carpal recess), second and third MCP joints (dorsal and palmar recess), knees (suprapatellar and lateral parapatellar recess) and ankles (anterior tibiotalar recess, medial tendon sheaths and lateral tendon sheaths))                                                                                                                                                                                                                                                                                                                                           | NA | SDAI  | NA | Same day | r=0.72, p<0.001   | L/U/L/L | H/L/H   |
|                            |                 |                                                                        |                                  |        | US: PD in 12 joints, sum score (bilateral elbows (anterior and posterior recess), wrists (dorsal and carpal recess), second and third MCP joints (dorsal and palmar recess), knees (suprapatellar and lateral parapatellar recess) and ankles (anterior tibiotalar recess, medial tendon sheaths and lateral tendon sheaths))                                                                                                                                                                                                                                                                                                                                           | NA | SDAI  | NA | Same day | r=0.6, p=0.006    |         |         |
|                            |                 |                                                                        |                                  |        | US: PD in 12 joints, sum score (bilateral elbows (anterior and posterior recess), wrists (dorsal and carpal recess), second and third MCP joints (dorsal and palmar recess), knees (suprapatellar and lateral parapatellar recess) and ankles (anterior tibiotalar recess, medial tendon sheaths and lateral tendon sheaths))                                                                                                                                                                                                                                                                                                                                           | NA | CDAI  | NA | Same day | r=0.6, p=0.006    |         |         |

|                            |                                    |                                                                                          |                                    |                         |                                                                                                                                                                                                                                                                                       |    |                                                                        |    |                                |                                                                  |          |                                                                                                                                                                                                                                                              |
|----------------------------|------------------------------------|------------------------------------------------------------------------------------------|------------------------------------|-------------------------|---------------------------------------------------------------------------------------------------------------------------------------------------------------------------------------------------------------------------------------------------------------------------------------|----|------------------------------------------------------------------------|----|--------------------------------|------------------------------------------------------------------|----------|--------------------------------------------------------------------------------------------------------------------------------------------------------------------------------------------------------------------------------------------------------------|
|                            |                                    |                                                                                          |                                    |                         | US: PD in 6 joints, sum score (bilateral wrists (dorsal recess) and second and third MCP joints (dorsal recess))                                                                                                                                                                      | NA | DAS28                                                                  | NA | Same day                       | r=0.67, p<0.01                                                   |          |                                                                                                                                                                                                                                                              |
|                            |                                    |                                                                                          |                                    |                         | US: PD in 6 joints, sum score (bilateral wrists (dorsal recess) and second and third MCP joints (dorsal recess))                                                                                                                                                                      | NA | SDAI                                                                   | NA | Same day                       | r=0.55, p<0.05                                                   |          |                                                                                                                                                                                                                                                              |
|                            |                                    |                                                                                          |                                    |                         | US: PD in 6 joints, sum score (bilateral wrists (dorsal recess) and second and third MCP joints (dorsal recess))                                                                                                                                                                      | NA | CDAI                                                                   | NA | Same day                       | r=0.54, p<0.05                                                   |          |                                                                                                                                                                                                                                                              |
| Krabbe, 2016 <sup>a</sup>  | Cross-sectional                    | RA patients (n=62)                                                                       | DAS28 3.6, median                  | NR                      | Optical spectral transmission imaging of wrists, MCP1-5, (PIP)1-5 of both hands, at patient level                                                                                                                                                                                     | NA | DAS28                                                                  | NA | NR                             | r=0.31, p=0.02                                                   | L/U/L/U  | H/L/L                                                                                                                                                                                                                                                        |
| Mandl, 2011                | SLR: 14 (quantitative analysis: 0) | RA patients (n=1307)                                                                     | NR                                 | NR                      | US to assess synovitis using GS (n=1), PD (n=1) or GS+PD (n=12) using different scoring systems (binary (n=8), semiquantitative (n=14), quantitative (n=2), cumulative score of individual joint scores (n=14))                                                                       | NR | Clinical (n=13), laboratory (n=13), X-ray (n=3), US (n=1) or MRI (n=6) | NR | NR                             |                                                                  | Moderate | Moderate                                                                                                                                                                                                                                                     |
|                            |                                    |                                                                                          |                                    |                         |                                                                                                                                                                                                                                                                                       |    |                                                                        |    |                                |                                                                  |          | US can be regarded as a valuable tool for globally examining the extent of synovitis in RA. However, it is presently difficult to determine a minimal number of joints to be included in a global US score. Further validation of proposed scores is needed. |
| Ngai ng, 2019 <sup>a</sup> | Cross-sectional                    | RA patients (n=19)                                                                       | DAS28-CRP 4.66, median             | 5.5Y, median            | Whole body magnetic resonance imaging: sum-score of 26 joints (28 conventional joints minus elbows), joint inflammation was defined in two ways; 1) as presence of synovitis and/or osteitis, 2) as the presence of synovitis only (28 conventional joints, bilateral ankles, MTP1-5) | NA | DAS28-CRP                                                              | NA | NR                             | r=0.20, p=0.47                                                   | L/H/L/L  | H/L/H                                                                                                                                                                                                                                                        |
|                            |                                    |                                                                                          |                                    |                         | Ultrasound: sum-score of 28 joints (conventional joints; US was graded 0-3 on both B-mode and colour Doppler(CD), and subsequently converted to +/- by defining US synovitis as B mode ≥2 or CD ≥1)                                                                                   | NA | DAS28-CRP                                                              | NA | NR                             | r=-0.26, p=0.28                                                  |          |                                                                                                                                                                                                                                                              |
| Van Onna, 2016             | Case control                       | RA patients in different categories of disease activity: DAS28<2.6, 2.6-5.1, >5.1 (n=59) | DAS28 3.6                          | 1-9Y (range of medians) | Optical spectral transmission (OST) in 7 joints, at patient level                                                                                                                                                                                                                     | NA | DAS28                                                                  | NA | Same day (within window of 4h) | r=0.42, p=0.001                                                  | L/H/L/L  | H/L/L                                                                                                                                                                                                                                                        |
| Vlad, 2011                 | Cross-sectional                    | RA patients with at least one painful or clinically swollen joint (n=42)                 | DAS28 6.15; CDAI 33.90; SDAI 64.23 | 64.64M                  | US: Echographic Score, sum of GS scores (0-3) of 10 joints (MCP2-5 dorsal and volar, PIP2-5 dorsal and volar, radiocarpal dorsal and intercarpal joint dorsal) of both hands                                                                                                          | NA | CDAI                                                                   | NA | Same day                       | r=0.591, p<0.001; r=0.628, p<0.001 (different in text and table) | L/L/L/L  | H/L/H                                                                                                                                                                                                                                                        |
|                            |                                    |                                                                                          |                                    |                         | US: Echographic Score, sum of GS scores (0-3) of 10 joints (MCP2-5 dorsal and volar, PIP2-5 dorsal and volar, radiocarpal dorsal and intercarpal joint dorsal) of both hands                                                                                                          | NA | SDAI                                                                   | NA | Same day                       | r=0.351, p<0.001; r=0.403, p<0.01 (different in text and table)  |          |                                                                                                                                                                                                                                                              |
|                            |                                    |                                                                                          |                                    |                         | US: Echographic Score, sum of GS scores (0-3) of 10 joints (MCP2-5 dorsal and volar, PIP2-5 dorsal and volar, radiocarpal dorsal and intercarpal joint dorsal) of both hands                                                                                                          | NA | DAS28                                                                  | NA | Same day                       | r=0.394, p=0.010                                                 |          |                                                                                                                                                                                                                                                              |
|                            |                                    |                                                                                          |                                    |                         | US: Volar echographic Score, sum of GS scores (0-3) of 8 joints (MCP2-5 volar, PIP2-5 volar) of both hands                                                                                                                                                                            | NA | CDAI                                                                   | NA | Same day                       | r=0.471, p=0.002; r=0.470, p<0.01 (different in text and table)  |          |                                                                                                                                                                                                                                                              |

|              |                 |                                                  |                                 |    |                                                                                                                                                                                            |    |           |    |          |                                                                 |         |       |
|--------------|-----------------|--------------------------------------------------|---------------------------------|----|--------------------------------------------------------------------------------------------------------------------------------------------------------------------------------------------|----|-----------|----|----------|-----------------------------------------------------------------|---------|-------|
|              |                 |                                                  |                                 |    | US: Volar echographic Score, sum of GS scores (0-3) of 8 joints (MCP2-5 volar, PIP2-5 volar) of both hands                                                                                 | NA | SDAI      | NA | Same day | r=0.379, p=0.013; r=0.468, p<0.01 (different in text and table) |         |       |
|              |                 |                                                  |                                 |    | US: Volar echographic Score, sum of GS scores (0-3) of 8 joints (MCP2-5 volar, PIP2-5 volar) of both hands                                                                                 | NA | DAS28     | NA | Same day | r=0.374, p=0.015; r=0.407, p<0.01 (different in text and table) |         |       |
|              |                 |                                                  |                                 |    | US: Dorsal echographic Score, sum of GS scores (0-3) of 10 joints (MCP2-5 dorsal, PIP2-5 dorsal, radiocarpal dorsal and intercarpal joint dorsal) of both hands                            | NA | CDAI      | NA | Same day | r=0.625, p<0.001; r=0.690, p<0.01 (different in text and table) |         |       |
|              |                 |                                                  |                                 |    | US: Dorsal echographic Score, sum of GS scores (0-3) of 10 joints (MCP2-5 dorsal, PIP2-5 dorsal, radiocarpal dorsal and intercarpal joint dorsal) of both hands                            | NA | SDAI      | NA | Same day | r=0.251, p<0.001; r=0.274, p=0.08 (different in text and table) |         |       |
|              |                 |                                                  |                                 |    | US: Dorsal echographic Score, sum of GS scores (0-3) of 10 joints (MCP2-5 dorsal, PIP2-5 dorsal, radiocarpal dorsal and intercarpal joint dorsal) of both hands                            | NA | DAS28     | NA | Same day | r=0.345, p=0.025; r=0.407, p<0.01 (different in text and table) |         |       |
|              |                 |                                                  |                                 |    | US: Number of echographically Positive Joints for synovitis of 10 joints (MCP2-5 dorsal and volar, PIP2-5 dorsal and volar, radiocarpal dorsal and intercarpal joint dorsal) of both hands | NA | DAS28     | NA | Same day | r=0.390, p=0.011                                                |         |       |
|              |                 |                                                  |                                 |    | US: Number of volar echographically Positive Joints for synovitis of 8 joints (MCP2-5 volar, PIP2-5 volar) of both hands                                                                   | NA | DAS28     | NA | Same day | r=0.373, p=0.015                                                |         |       |
|              |                 |                                                  |                                 |    | US: Number of dorsal echographically Positive Joints for synovitis of 10 joints (MCP2-5 dorsal, PIP2-5 dorsal, radiocarpal dorsal and intercarpal joint dorsal) of both hands              | NA | DAS28     | NA | Same day | r=0.341, p=0.027                                                |         |       |
| Witt, 2016   | Cross-sectional | RA patients (n=45)                               | DAS28 4.1; CDAI 21.2; SDAI 22.5 | NR | Automated breast volume scanner (The dorsal and palmar sides of each hand and the dorsal aspect of the toes were scanned)                                                                  | NA | CDAI      | NA | NR       | r=0.41                                                          | L/U/U/U | H/L/L |
|              |                 |                                                  |                                 |    | Automated breast volume scanner (The dorsal and palmar sides of each hand and the dorsal aspect of the toes were scanned)                                                                  | NA | SDAI      | NA | NR       | r=0.45                                                          |         |       |
| Yokota, 2018 | Cross-sectional | RA patients with musculoskeletal symptoms (n=27) | DAS28-CRP 3.5 9.4Y              |    | Superb microvascular imaging score (in the joints of both hands (MCP, PIP, and IP joints), the wrists, elbows, and knees (total 26 joints))                                                | NA | DAS28-CRP | NA | Same day | r=0.74, p<0.001                                                 | L/L/L/L | H/L/H |

|                                         |                 |                                       |                     |              |                                                                                                                                       |    |           |    |                |                              |         |       |
|-----------------------------------------|-----------------|---------------------------------------|---------------------|--------------|---------------------------------------------------------------------------------------------------------------------------------------|----|-----------|----|----------------|------------------------------|---------|-------|
|                                         |                 |                                       |                     |              | Conventional PD imaging (cPDI) (in the joints of bothhands (MCP, PIP, and IP joints), the wrists,elbows, and knees (total 26 joints)) | NA | DAS28-CRP | NA | Same day       | r=0.57, p=0.002              |         |       |
| Zufferey, 2014                          | Cross-sectional | RA patients (n=536)                   | DAS28-ESR 3.4 (1.4) | 6.5Y, median | US: SONAR B-mode score (0-3) of 22 joints (MCP2-5 joints, PIP2-5 joints, wrist, elbows, knees)                                        | NA | DAS28-ESR | NA | Within 15 days | r=0.40 (0.32-0.47, p<0.0001) | L/H/H/L | H/L/H |
|                                         |                 |                                       |                     |              | US: PD score (0-3) of 22 joints (MCP2-5 joints, PIP2-5 joints, wrist, elbows, knees)                                                  | NA | DAS28-ESR | NA | Within 15 days | r=0.40 (0.32-0.48, p<0.0001) |         |       |
| <b>Histology vs composite index</b>     |                 |                                       |                     |              |                                                                                                                                       |    |           |    |                |                              |         |       |
| Ostendorf, 2001                         | Cross-sectional | RA patients (n=22)                    | DAS 4.15            | 6.42Y        | Miniarthroscopy: Macroscopic hyperaemia (2nd MCP joint of dominant hand)                                                              | NA | DAS       | NA | NR             | p=0.004                      | L/L/L/L | H/L/L |
|                                         |                 |                                       |                     |              | Miniarthroscopy: Villus proliferation (2nd MCP joint of dominant hand)                                                                | NA | DAS       | NA | NR             | p=0.0035                     |         |       |
| <b>Biomarker vs clinical assessment</b> |                 |                                       |                     |              |                                                                                                                                       |    |           |    |                |                              |         |       |
| do Prado, 2016                          | Cross-sectional | RA patients (n=64)                    | DAS28-ESR 4.02      | 5Y           | IL-2                                                                                                                                  | NA | TJC28     | NA | Same day       | r=-0.03 (-0.29-0.23), ns     | L/U/H/L | H/L/L |
|                                         |                 |                                       |                     |              | IL-2                                                                                                                                  | NA | SJC28     | NA | Same day       | r=0.06 (-0.18-2.71), ns      |         |       |
|                                         |                 |                                       |                     |              | IL-4                                                                                                                                  | NA | TJC28     | NA | Same day       | r=0.02 (-0.25-0.28), ns      |         |       |
|                                         |                 |                                       |                     |              | IL-4                                                                                                                                  | NA | SJC28     | NA | Same day       | r=0.17 (-0.74-0.39), ns      |         |       |
|                                         |                 |                                       |                     |              | IL-6                                                                                                                                  | NA | TJC28     | NA | Same day       | r=0.09 (-0.17-0.32), ns      |         |       |
|                                         |                 |                                       |                     |              | IL-6                                                                                                                                  | NA | SJC28     | NA | Same day       | r=0.39 (0.15-0.59), p<0.01   |         |       |
|                                         |                 |                                       |                     |              | IL-10                                                                                                                                 | NA | TJC28     | NA | Same day       | r=-0.12 (-0.37-0.14), ns     |         |       |
|                                         |                 |                                       |                     |              | IL-10                                                                                                                                 | NA | SJC28     | NA | Same day       | r=0.09 (-0.14-0.31), ns      |         |       |
|                                         |                 |                                       |                     |              | IL-17                                                                                                                                 | NA | TJC28     | NA | Same day       | r=0.12 (-0.15-0.35), ns      |         |       |
|                                         |                 |                                       |                     |              | IL-17                                                                                                                                 | NA | SJC28     | NA | Same day       | r=0.17 (-0.91-0.40), ns      |         |       |
|                                         |                 |                                       |                     |              | TNF                                                                                                                                   | NA | TJC28     | NA | Same day       | r=0.03 (-0.24-0.30), ns      |         |       |
|                                         |                 |                                       |                     |              | TNF                                                                                                                                   | NA | SJC28     | NA | Same day       | r=0.07 (-0.15-0.32), ns      |         |       |
|                                         |                 |                                       |                     |              | IFN                                                                                                                                   | NA | TJC28     | NA | Same day       | r=0.05 (-0.19-0.32), ns      |         |       |
|                                         |                 |                                       |                     |              | IFN                                                                                                                                   | NA | SJC28     | NA | Same day       | r=-0.04 (-0.29-0.19), ns     |         |       |
|                                         |                 |                                       |                     |              | VEGF                                                                                                                                  | NA | TJC28     | NA | Same day       | r=0.15 (-0.12-0.40), ns      |         |       |
|                                         |                 |                                       |                     |              | VEGF                                                                                                                                  | NA | SJC28     | NA | Same day       | r=0.14 (-0.13-0.41), ns      |         |       |
| Gunaydin, 2006                          | Cross-sectional | RA patients (n=50)                    | DAS28 5.4 (1.17)    | 10Y          | Serum leptin level                                                                                                                    | NA | SJC28     | NA | Same day       | r=0.046, p=0.749             | L/U/H/L | H/L/H |
|                                         |                 |                                       |                     |              | Serum leptin level                                                                                                                    | NA | TJC28     | NA | Same day       | r=0.072, p=0.619             |         |       |
| Ha, 2014                                | Cross-sectional | RA patients (n=69)                    | DAS28 3.04 (1.58)   | 5.3Y         | Leukine-rich alpha-2 glycoprotein (LRG) serum level                                                                                   | NA | SJC28     | NA | Same day       | r=0.671, p<0.001             | L/U/H/L | H/L/H |
|                                         |                 |                                       |                     |              | Leukine-rich alpha-2 glycoprotein (LRG) serum level                                                                                   | NA | TJC28     | NA | Same day       | r=0.514, p<0.001             |         |       |
| Metawi, 2011                            | Cross-sectional | RA patients with knee effusion (n=30) | DAS28 4.8           | 9.5Y         | Serum IL-17A                                                                                                                          | NA | TJC       | NA | NR             | r=0.495, p=0.005             | L/U/H/U | H/L/H |
|                                         |                 |                                       |                     |              | Synovial IL-17A                                                                                                                       | NA | TJC       | NA | NR             | r=0.403, p=0.027             |         |       |
|                                         |                 |                                       |                     |              | Serum IL-17A                                                                                                                          | NA | SJC       | NA | NR             | r=0.573, p=0.001             |         |       |



|                                       |                 |                                  |                                                                            |              |                                                                                                                                                                                                                                                                                                                       |    |       |    |                                                 |                                       |         |       |
|---------------------------------------|-----------------|----------------------------------|----------------------------------------------------------------------------|--------------|-----------------------------------------------------------------------------------------------------------------------------------------------------------------------------------------------------------------------------------------------------------------------------------------------------------------------|----|-------|----|-------------------------------------------------|---------------------------------------|---------|-------|
|                                       |                 |                                  |                                                                            |              | Synovial IL-17A                                                                                                                                                                                                                                                                                                       | NA | SJC   | NA | NR                                              | r=0.223,<br>p=0.236                   |         |       |
| Myngbay, 2019                         | Cross-sectional | RA patients (n=57)               | DAS28-CRP 3.79                                                             | 8.04Y        | Collagen triple helix repeat containing 1 (CTHRC1) protein                                                                                                                                                                                                                                                            | NA | SJC28 | NA | Same time point                                 | r=0.307,<br>p=0.02                    | L/U/H/L | H/L/H |
|                                       |                 |                                  |                                                                            |              | Collagen triple helix repeat containing 1 (CTHRC1) protein                                                                                                                                                                                                                                                            | NA | TJC28 | NA | Same time point                                 | No correlation                        |         |       |
| Nordal, 2017                          | Cross-sectional | RA patients (n=141)              | DAS28-ESR 4.4                                                              | 6.8Y         | Calprotectin                                                                                                                                                                                                                                                                                                          | NA | SJC32 | NA | Same time point                                 | r=0.47, p<0.05                        | L/U/H/L | H/L/L |
|                                       |                 |                                  |                                                                            |              | Calprotectin                                                                                                                                                                                                                                                                                                          | NA | TJC32 | NA | Same time point                                 | r=0.17,<br>p<0.001                    |         |       |
|                                       |                 |                                  |                                                                            |              | S100A12                                                                                                                                                                                                                                                                                                               | NA | SJC32 | NA | Same time point                                 | r=0.35, p<0.05                        |         |       |
|                                       |                 |                                  |                                                                            |              | S100A12                                                                                                                                                                                                                                                                                                               | NA | TJC32 | NA | Same time point                                 | r=0.14, ns                            |         |       |
|                                       |                 |                                  |                                                                            |              | IL-6                                                                                                                                                                                                                                                                                                                  | NA | SJC32 | NA | Same time point                                 | r=0.41, p<0.05                        |         |       |
|                                       |                 |                                  |                                                                            |              | IL-6                                                                                                                                                                                                                                                                                                                  | NA | TJC32 | NA | Same time point                                 | r=0.09, ns                            |         |       |
|                                       |                 |                                  |                                                                            |              | VEGF                                                                                                                                                                                                                                                                                                                  | NA | SJC32 | NA | Same time point                                 | r=0.13, ns                            |         |       |
|                                       |                 |                                  |                                                                            |              | VEGF                                                                                                                                                                                                                                                                                                                  | NA | TJC32 | NA | Same time point                                 | r=-0.03, ns                           |         |       |
| Papadopoulos, 2008                    | Cross-sectional | ACPA positive RA patients (n=72) | DAS28 6.52                                                                 | NR           | ACPA                                                                                                                                                                                                                                                                                                                  | NA | TJC   | NA | Same day                                        | No correlation                        | L/U/H/L | H/L/H |
| Rooney, 2011                          | Cross-sectional | RA patients (n=105)              | DAS28-ESR 3.7 (2.6-4.5);<br>CDAI 11.1 (5.7-18.4);<br>SDAI 11.9 (6.1-19.1). | 6.1Y, median | Plasma fibrinogen                                                                                                                                                                                                                                                                                                     | NA | SJC28 | NA | Same day<br>Within 2W<br>from clinical<br>visit | No correlation<br>r=0.30,<br>p=0.0021 | L/U/H/L | H/L/H |
|                                       |                 |                                  |                                                                            |              | Plasma fibrinogen                                                                                                                                                                                                                                                                                                     | NA | SJC28 | NA | Within 2W<br>from clinical<br>visit             | r=0.26,<br>p=0.0091                   |         |       |
| Shah, 2014                            | Cross-sectional | RA patients (n=58)               | DAS28 5.3                                                                  | 5Y, median   | Serum ACPA                                                                                                                                                                                                                                                                                                            | NA | TJC28 | NA | NR                                              | r=-0.144,<br>p=0.282                  | L/U/H/U | H/L/H |
|                                       |                 |                                  |                                                                            |              | Serum ACPA                                                                                                                                                                                                                                                                                                            | NA | SJC28 | NA | NR                                              | r=-0.051,<br>p=0.705                  |         |       |
| Sockaling, 2009                       | Cross-sectional | RA patients (n=51)               | DAS28 4.11, median                                                         | NR           | Serum ACPA                                                                                                                                                                                                                                                                                                            | NA | TJC   | NA | NR                                              | No correlation<br>(p=0.478)           | L/U/H/U | H/L/H |
|                                       |                 |                                  |                                                                            |              | Serum ACPA                                                                                                                                                                                                                                                                                                            | NA | SJC   | NA | NR                                              | No correlation<br>(p=0.417)           |         |       |
| Targońska-Stepniak, 2008              | Cross-sectional | RA patients (n=37)               | DAS28 4.8                                                                  | 136.5M       | Serum leptin (RA duration >10Y)                                                                                                                                                                                                                                                                                       | NA | TJC   | NA | NR                                              | r=0.59, p=0.01                        | L/U/H/U | H/L/H |
|                                       |                 |                                  |                                                                            |              | Serum leptin (RA duration <10Y)                                                                                                                                                                                                                                                                                       | NA | TJC   | NA | NR                                              | r=0.41, p=0.69                        |         |       |
| <b>Imaging vs clinical assessment</b> |                 |                                  |                                                                            |              |                                                                                                                                                                                                                                                                                                                       |    |       |    |                                                 |                                       |         |       |
| Axelsen, 2014                         | Cross-sectional | RA patients (n=20)               | DAS28-CRP 4.30 (1.91-7.32), median (range)                                 | 6Y, median   | MRI assessment of synovitis in 76 joints (lateral sternoclavicular, acromioclavicular, glenohumeral, elbow, wrist, first CMC, first/fifth MCP, first IP, second/fifth PIP, second/fifth DIP, hip, knee, ankle, first tarsometatarsal (TMT), first/fifth MTP, first/fifth PIP and second/fifth DIP joints of the feet) | NA | SJC66 | NA | Within 1W                                       | k=0.04 (not specified: -0.29-1.00)    | L/U/H/L | H/L/H |
|                                       |                 |                                  |                                                                            |              | MRI bone marrow oedema (a lesion within the trabecular bone, with ill-defined margins and signal characteristics consistent with increased water content, i.e. high signal intensity on STIR images and low signal intensity on T1-weighted images)                                                                   | NA | SJC66 | NA | Within 1W                                       | k=0 (not specified: -0.98-1)          |         |       |

|                 |                 |                                |                      |       |                                                                                                                                                                                                                                                                                                                                                                                                                                                                                                                                                                                                                                                                           |    |                         |    |           |                                    |         |       |
|-----------------|-----------------|--------------------------------|----------------------|-------|---------------------------------------------------------------------------------------------------------------------------------------------------------------------------------------------------------------------------------------------------------------------------------------------------------------------------------------------------------------------------------------------------------------------------------------------------------------------------------------------------------------------------------------------------------------------------------------------------------------------------------------------------------------------------|----|-------------------------|----|-----------|------------------------------------|---------|-------|
|                 |                 |                                |                      |       | MRI assessment of synovitis in 76 joints (lateral sternoclavicular, acromioclavicular, glenohumeral, elbow, wrist, first CMC, first through fifth MCP, first IP, second through fifth PIP, second through fifth DIP, hip, knee, ankle, first tarsometatarsal (TMT), first through fifth MTP, first through fifth PIP and second through fifth DIP joints of the feet)                                                                                                                                                                                                                                                                                                     | NA | TJC68                   | NA | Within 1W | k=0.12 (not specified: -0.36-0.59) |         |       |
|                 |                 |                                |                      |       | MRI bone marrow oedema (a lesion within the trabecular bone, with ill-defined margins and signal characteristics consistent with increased water content, i.e. high signal intensity on STIR images and low signal intensity on T1-weighted images)                                                                                                                                                                                                                                                                                                                                                                                                                       | NA | TJC68                   | NA | Within 1W | k=0.00 (not specified: -0.35-0.35) |         |       |
| Besselink, 2018 | Cross-sectional | RA patients (n=50)             | DAS28-ESR 3.9 (1.20) | NR    | Optical spectral transmission (OST) model (sum of affected joints)                                                                                                                                                                                                                                                                                                                                                                                                                                                                                                                                                                                                        | NA | Clinical swollen joints | NA | Same day  | r=0.30 (95%CI 0.11-0.46, p<0.01)   | L/H/H/L | H/L/L |
|                 |                 |                                |                      |       | Optical spectral transmission (OST) model (sum of affected joints)                                                                                                                                                                                                                                                                                                                                                                                                                                                                                                                                                                                                        | NA | Clinical tender joints  | NA | Same day  | r=-0.02 (95%CI -0.21-0.17, p=0.84) |         |       |
| Ceponis, 2014   | Cross-sectional | Established RA patients (n=46) | CDAI 15.9; HAQ 0.64  | 16.6Y | US: total Synovial Hypertrophy score (tSH), range 0-135: Synovial hypertrophy (B-mode examination) was scored on a semiquantitative scale (where 0=absence, 1=mild, 2=moderate, and 3=severe. dorsal and palmar joint regions and ulnar and radial aspects of the interphalangeal and second through fifth PIP joints; dorsal and palmar joint regions of the first through fifth and ulnar and radial aspects of the second and fifth MCP joints; and dorsal and volar joint regions and radial and ulnar aspects of the wrist (distal radioulnar, midcarpal, radiocarpal, and ulnar-carpal) joints were examined in long (sagittal plane) and short (axial plane) axes. | NA | SJC28                   | NA | NR        | r=0.4804, p<0.005                  | L/L/H/U | H/L/H |

| Author                                                                   | Study Design     | Population                                                  | Follow-up                        | Outcome  | Measure                                                                                                                                                                                                                                                                                                                                                                                                                                                                                                                                                                                                                                                                  | Score            | Scale  | Time | Statistical Results | Direction         | Direction |       |
|--------------------------------------------------------------------------|------------------|-------------------------------------------------------------|----------------------------------|----------|--------------------------------------------------------------------------------------------------------------------------------------------------------------------------------------------------------------------------------------------------------------------------------------------------------------------------------------------------------------------------------------------------------------------------------------------------------------------------------------------------------------------------------------------------------------------------------------------------------------------------------------------------------------------------|------------------|--------|------|---------------------|-------------------|-----------|-------|
| Filer, 2017 <sup>a</sup>                                                 | Cross-sectional  | RA patients with at least 1 joint amenable to biopsy (n=15) | NR                               | NR       | US: total Synovial Hypertrophy score (tSH), range 0-135: Synovial hypertrophy (B-mode examination) was scored on a semiquantitative scale (where 0=absence, 1=mild, 2=moderate, and 3=severe. orsal and palmar joint regions and ulnar and radial aspects of the interphalangeal and second through fifth PIP joints; dorsal and palmar joint regions of the first through fifth and ulnar and radial aspects of the second and fifth MCP joints; and dorsal and volar joint regions and radial and ulnar aspects of the wrist (distal radioulnar, midcarpal, radiocarpal, and ulnar-carpal) joints were examined in long (sagittal plane) and short (axial plane) axes. | NA               | TJC28  | NA   | NR                  | r=0.4314, p<0.005 | L/U/H/L   | H/L/L |
|                                                                          |                  |                                                             |                                  |          | US: total Synovial PD score (tSPD)                                                                                                                                                                                                                                                                                                                                                                                                                                                                                                                                                                                                                                       | NA               | SJC28  | NA   | NR                  | r=0.6546, p<0.005 |           |       |
|                                                                          |                  |                                                             |                                  |          | US: total Synovial PD score (tSPD)                                                                                                                                                                                                                                                                                                                                                                                                                                                                                                                                                                                                                                       | NA               | TJC28  | NA   | NR                  | r=0.3559, p<0.01  |           |       |
|                                                                          |                  |                                                             |                                  |          | US: Sonographic effusion                                                                                                                                                                                                                                                                                                                                                                                                                                                                                                                                                                                                                                                 | NA               | SJC28  | NA   | NR                  | r=0.3270, p<0.05  |           |       |
|                                                                          |                  |                                                             |                                  |          | US: Sonographic effusion                                                                                                                                                                                                                                                                                                                                                                                                                                                                                                                                                                                                                                                 | NA               | TJC28  | NA   | NR                  | r=0.3449, p<0.01  |           |       |
| Hammer, 2018 <sup>a</sup>                                                | Cross-sectional  | RA patients (n=174)                                         | NR                               | 10Y      | GS US (12 joint indices for MCP and wrist joints), score 0-3                                                                                                                                                                                                                                                                                                                                                                                                                                                                                                                                                                                                             | NA               | SJC28  | NA   | NR                  | r=0.78, p<0.01    | L/U/H/L   | H/L/L |
|                                                                          |                  |                                                             |                                  |          | GS US (12 joint indices for MCP and wrist joints), score 0-3                                                                                                                                                                                                                                                                                                                                                                                                                                                                                                                                                                                                             | NA               | TJC28  | NA   | NR                  | r=0.65, p<0.05    |           |       |
|                                                                          |                  |                                                             |                                  |          | PD US (12 joint indices for MCP and wrist joints), score 0-3                                                                                                                                                                                                                                                                                                                                                                                                                                                                                                                                                                                                             | NA               | SJC28  | NA   | NR                  | r=0.76, p<0.05    |           |       |
|                                                                          |                  |                                                             |                                  |          | PD US (12 joint indices for MCP and wrist joints), score 0-3                                                                                                                                                                                                                                                                                                                                                                                                                                                                                                                                                                                                             | NA               | TJC28  | NA   | NR                  | ns                |           |       |
|                                                                          |                  |                                                             |                                  |          | TJC32 (wrist, MCP1-5, PIP2-3, elbow, knee, ankle and MTP1-5 bilaterally)                                                                                                                                                                                                                                                                                                                                                                                                                                                                                                                                                                                                 | Presence/absence | US: GS | 0-3  | Same day            | k 0.21            |           |       |
| TJC32 (wrist, MCP1-5, PIP2-3, elbow, knee, ankle and MTP1-5 bilaterally) | Presence/absence | US: PD                                                      | 0-3                              | Same day | k 0.20                                                                                                                                                                                                                                                                                                                                                                                                                                                                                                                                                                                                                                                                   |                  |        |      |                     |                   |           |       |
| SJC32 (wrist, MCP1-5, PIP2-3, elbow, knee, ankle and MTP1-5 bilaterally) | Presence/absence | US: PD                                                      | 0-3                              | Same day | k 0.57                                                                                                                                                                                                                                                                                                                                                                                                                                                                                                                                                                                                                                                                   |                  |        |      |                     |                   |           |       |
| SJC32 (wrist, MCP1-5, PIP2-3, elbow, knee, ankle and MTP1-5 bilaterally) | Presence/absence | US: PD                                                      | 0-3                              | Same day | k 0.56                                                                                                                                                                                                                                                                                                                                                                                                                                                                                                                                                                                                                                                                   |                  |        |      |                     |                   |           |       |
| Kawashiri, 2011                                                          | Cross-sectional  | RA patients (n=22)                                          | DAS28 5.69; SDAI 30.6; CDAI 28.3 | 2.3Y     | US: PD in 12 joints, sum score (bilateral elbows (anterior and posterior recess), wrists (dorsal and carpal recess), second and third MCP joints (dorsal and palmar recess), knees (suprapatellar and lateral parapatellar recess) and ankles (anterior tibiotalar recess, medial tendon sheaths and lateral tendon sheaths))                                                                                                                                                                                                                                                                                                                                            | NA               | TJC    | NA   | Same day            | r=0.52, p=0.017   | L/U/H/L   | H/L/H |

|                             |                 |                                                                                          |                                    |                         |                                                                                                                                                                                                                                                                                                                               |    |                                                             |    |                                |                          |                                          |         |       |
|-----------------------------|-----------------|------------------------------------------------------------------------------------------|------------------------------------|-------------------------|-------------------------------------------------------------------------------------------------------------------------------------------------------------------------------------------------------------------------------------------------------------------------------------------------------------------------------|----|-------------------------------------------------------------|----|--------------------------------|--------------------------|------------------------------------------|---------|-------|
|                             |                 |                                                                                          |                                    |                         | US: PD in 12 joints, sum score (bilateral elbows (anterior and posterior recess), wrists (dorsal and carpal recess), second and third MCP joints (dorsal and palmar recess), knees (suprapatellar and lateral parapatellar recess) and ankles (anterior tibiotalar recess, medial tendon sheaths and lateral tendon sheaths)) | NA | SJC                                                         | NA | Same day                       | r=0.48, p=0.028          |                                          |         |       |
|                             |                 |                                                                                          |                                    |                         | US: PD in 6 joints, sum score (bilateral wrists (dorsal recess) and second and third MCP joints (dorsal recess))                                                                                                                                                                                                              | NA | TJC                                                         | NA | Same day                       | r=0.50, p<0.05           |                                          |         |       |
|                             |                 |                                                                                          |                                    |                         | US: PD in 6 joints, sum score (bilateral wrists (dorsal recess) and second and third MCP joints (dorsal recess))                                                                                                                                                                                                              | NA | SJC                                                         | NA | Same day                       | r=0.44, p<0.05           |                                          |         |       |
| Van Omma, 2016              | Case control    | RA patients in different categories of disease activity: DAS28<2.6, 2.6-5.1, >5.1 (n=59) | DAS28 3.6                          | 1-9Y (range of medians) | Optical spectral transmission (OST) in ? joints, at patient level                                                                                                                                                                                                                                                             | NA | SJC28                                                       | NA | Same day (within window of 4h) | r=0.50, p<0.0001         | AUC-ROC 0.79 (95%CI 0.72-0.86, p<0.0001) | L/H/H/L | H/L/L |
|                             |                 |                                                                                          |                                    |                         | Optical spectral transmission (OST) in ? joints, at patient level                                                                                                                                                                                                                                                             | NA | TJC28                                                       | NA | Same day (within window of 4h) | r=0.25, p=0.037          | AUC-ROC 0.78 (95%CI 0.71-0.83, p<0.0001) |         |       |
| Vlad, 2011                  | Cross-sectional | RA patients with at least one painful or clinically swollen joint (n=42)                 | DAS28 6.15; CDAI 33.90; SDAI 64.23 | 64.64M                  | US: Echographic Score, sum of GS scores (0-3) of 10 joints (MCP2-5 dorsal and volar, PIP2-5 dorsal and volar, radiocarpal dorsal and intercarpal joint dorsal) of both hands                                                                                                                                                  | NA | SJC                                                         | -  | Same day                       | r=0.432, p=0.004         |                                          | L/L/H/L | H/L/H |
|                             |                 |                                                                                          |                                    |                         | US: Echographic Score, sum of GS scores (0-3) of 10 joints (MCP2-5 dorsal and volar, PIP2-5 dorsal and volar, radiocarpal dorsal and intercarpal joint dorsal) of both hands                                                                                                                                                  | NA | TJC                                                         | -  | Same day                       | r=0.430, p=0.004         |                                          |         |       |
|                             |                 |                                                                                          |                                    |                         | US: Volar echographic Score, sum of GS scores (0-3) of 8 joints (MCP2-5 volar, PIP2-5 volar) of both hands                                                                                                                                                                                                                    | NA | SJC                                                         | NA | Same day                       | r=0.385, p=0.012         |                                          |         |       |
|                             |                 |                                                                                          |                                    |                         | US: Volar echographic Score, sum of GS scores (0-3) of 8 joints (MCP2-5 volar, PIP2-5 volar) of both hands                                                                                                                                                                                                                    | NA | TJC                                                         | NA | Same day                       | r=0.325, p=0.036         |                                          |         |       |
|                             |                 |                                                                                          |                                    |                         | US: Dorsal echographic Score, sum of GS scores (0-3) of 10 joints (MCP2-5 dorsal, PIP2-5 dorsal, radiocarpal dorsal and intercarpal joint dorsal) of both hands                                                                                                                                                               | NA | SJC                                                         | NA | Same day                       | r=0.406, p=0.008         |                                          |         |       |
|                             |                 |                                                                                          |                                    |                         | US: Dorsal echographic Score, sum of GS scores (0-3) of 10 joints (MCP2-5 dorsal, PIP2-5 dorsal, radiocarpal dorsal and intercarpal joint dorsal) of both hands                                                                                                                                                               | NA | TJC                                                         | NA | Same day                       | r=0.476, p=0.001         |                                          |         |       |
| Witt, 2016                  | Cross-sectional | RA patients (n=45)                                                                       | DAS28 4.1; CDAI 21.2; SDAI 22.5    | NR                      | Automated breast volume scanner (The dorsal and palmar sides of each hand and the dorsal aspect of the toes were scanned)                                                                                                                                                                                                     | NA | SJC                                                         | NA | NR                             | r=0.46                   |                                          | L/U/H/U | H/L/L |
| <b>Biomarker vs imaging</b> |                 |                                                                                          |                                    |                         |                                                                                                                                                                                                                                                                                                                               |    |                                                             |    |                                |                          |                                          |         |       |
| do Prado, 2016              | Cross-sectional | RA patients (n=64)                                                                       | DAS28-ESR 4.02                     | 5Y                      | IL-2                                                                                                                                                                                                                                                                                                                          | NA | US: 10-joint PD score (wrist, MCP2-3, PIP2-3 of both hands) | NA | Same day                       | r=-0.04 (-0.29-0.22, ns) |                                          | L/L/H/L | H/L/L |
|                             |                 |                                                                                          |                                    |                         | IL-2                                                                                                                                                                                                                                                                                                                          | NA | US: 10-joint GS score (wrist, MCP2-3, PIP2-3 of both hands) | NA | Same day                       | r=-0.12 (-0.37-0.15, ns) |                                          |         |       |

|                 |                 |                    |                                  |      |       |    |                                                                                                                                                                                                                                                                                                                               |    |          |                            |         |       |
|-----------------|-----------------|--------------------|----------------------------------|------|-------|----|-------------------------------------------------------------------------------------------------------------------------------------------------------------------------------------------------------------------------------------------------------------------------------------------------------------------------------|----|----------|----------------------------|---------|-------|
|                 |                 |                    |                                  |      | IL-4  | NA | US: 10-joint PD score (wrist, MCP2-3, PIP2-3 of both hands)                                                                                                                                                                                                                                                                   | NA | Same day | r=0.03 (-0.21-0.29), ns    |         |       |
|                 |                 |                    |                                  |      | IL-4  | NA | US: 10-joint GS score (wrist, MCP2-3, PIP2-3 of both hands)                                                                                                                                                                                                                                                                   | NA | Same day | r=-0.04 (-0.29-0.21), ns   |         |       |
|                 |                 |                    |                                  |      | IL-6  | NA | US: 10-joint PD score (wrist, MCP2-3, PIP2-3 of both hands)                                                                                                                                                                                                                                                                   | NA | Same day | r=0.33 (0.07-0.56), p<0.01 |         |       |
|                 |                 |                    |                                  |      | IL-6  | NA | US: 10-joint GS score (wrist, MCP2-3, PIP2-3 of both hands)                                                                                                                                                                                                                                                                   | NA | Same day | r=0.23 (-0.03-0.46), ns    |         |       |
|                 |                 |                    |                                  |      | IL-10 | NA | US: 10-joint PD score (wrist, MCP2-3, PIP2-3 of both hands)                                                                                                                                                                                                                                                                   | NA | Same day | r=0.04 (-0.21-0.30), ns    |         |       |
|                 |                 |                    |                                  |      | IL-10 | NA | US: 10-joint GS score (wrist, MCP2-3, PIP2-3 of both hands)                                                                                                                                                                                                                                                                   | NA | Same day | r=-0.08 (-0.34-0.18), ns   |         |       |
|                 |                 |                    |                                  |      | IL-17 | NA | US: 10-joint PD score (wrist, MCP2-3, PIP2-3 of both hands)                                                                                                                                                                                                                                                                   | NA | Same day | r=0.02 (-0.24-0.27), ns    |         |       |
|                 |                 |                    |                                  |      | IL-17 | NA | US: 10-joint GS score (wrist, MCP2-3, PIP2-3 of both hands)                                                                                                                                                                                                                                                                   | NA | Same day | r=-0.08 (-0.35-0.17), ns   |         |       |
|                 |                 |                    |                                  |      | TNF   | NA | US: 10-joint PD score (wrist, MCP2-3, PIP2-3 of both hands)                                                                                                                                                                                                                                                                   | NA | Same day | r=-0.11 (-0.36-0.16), ns   |         |       |
|                 |                 |                    |                                  |      | TNF   | NA | US: 10-joint GS score (wrist, MCP2-3, PIP2-3 of both hands)                                                                                                                                                                                                                                                                   | NA | Same day | r=-0.15 (-0.39-0.10), ns   |         |       |
|                 |                 |                    |                                  |      | IFN   | NA | US: 10-joint PD score (wrist, MCP2-3, PIP2-3 of both hands)                                                                                                                                                                                                                                                                   | NA | Same day | r=-0.20 (-0.45-0.09), ns   |         |       |
|                 |                 |                    |                                  |      | IFN   | NA | US: 10-joint GS score (wrist, MCP2-3, PIP2-3 of both hands)                                                                                                                                                                                                                                                                   | NA | Same day | r=-0.25 (-0.47-0.02), ns   |         |       |
|                 |                 |                    |                                  |      | VEGF  | NA | US: 10-joint PD score (wrist, MCP2-3, PIP2-3 of both hands)                                                                                                                                                                                                                                                                   | NA | Same day | r=-0.10 (-0.35-0.15), ns   |         |       |
|                 |                 |                    |                                  |      | VEGF  | NA | US: 10-joint GS score (wrist, MCP2-3, PIP2-3 of both hands)                                                                                                                                                                                                                                                                   | NA | Same day | r=-0.009 (-0.27-0.23), ns  |         |       |
| Kawashiri, 2011 | Cross-sectional | RA patients (n=22) | DAS28 5.69; SDAI 30.6; CDAI 28.3 | 2.3Y | VEGF  | NA | US: PD in 12 joints, sum score (bilateral elbows (anterior and posterior recess), wrists (dorsal and carpal recess), second and third MCP joints (dorsal and palmar recess), knees (suprapatellar and lateral parapatellar recess) and ankles (anterior tibiotalar recess, medial tendon sheaths and lateral tendon sheaths)) | NA | Same day | r=0.62, p=0.005            | L/L/H/L | H/L/H |
|                 |                 |                    |                                  |      | MMP-3 | NA | US: PD in 12 joints, sum score (bilateral elbows (anterior and posterior recess), wrists (dorsal and carpal recess), second and third MCP joints (dorsal and palmar recess), knees (suprapatellar and lateral parapatellar recess) and ankles (anterior tibiotalar recess, medial tendon sheaths and lateral tendon sheaths)) | NA | Same day | r=0.47, p=0.03             |         |       |
|                 |                 |                    |                                  |      | MMP-9 | NA | US: PD in 12 joints, sum score (bilateral elbows (anterior and posterior recess), wrists (dorsal and carpal recess), second and third MCP joints (dorsal and palmar recess), knees (suprapatellar and lateral parapatellar recess) and ankles (anterior tibiotalar recess, medial tendon sheaths and lateral tendon sheaths)) | NA | Same day | r=0.38, p=0.08             |         |       |



|                 |                                    |                                                                          |                                    |              |                                                                                                                                                                                                                                                                                       |      |                                                                                                                                                                                                                                                                                                                               |                           |           |                       |                                                                                                                                                                                                                                                              |          |          |   |
|-----------------|------------------------------------|--------------------------------------------------------------------------|------------------------------------|--------------|---------------------------------------------------------------------------------------------------------------------------------------------------------------------------------------------------------------------------------------------------------------------------------------|------|-------------------------------------------------------------------------------------------------------------------------------------------------------------------------------------------------------------------------------------------------------------------------------------------------------------------------------|---------------------------|-----------|-----------------------|--------------------------------------------------------------------------------------------------------------------------------------------------------------------------------------------------------------------------------------------------------------|----------|----------|---|
| Kawashiri, 2011 | Cross-sectional                    | RA patients (n=22)                                                       | DAS28 5.69; SDAI 30.6; CDAI 28.3   | 2.3Y         | US: PD in 6 joints, sum score (bilateral wrists (dorsal recess) and second and third MCP joints (dorsal recess))                                                                                                                                                                      | NA   | US: PD in 12 joints, sum score (bilateral elbows (anterior and posterior recess), wrists (dorsal and carpal recess), second and third MCP joints (dorsal and palmar recess), knees (suprapatellar and lateral parapatellar recess) and ankles (anterior tibiotalar recess, medial tendon sheaths and lateral tendon sheaths)) | NA                        | Same day  | r=0.92, p<0.0001      |                                                                                                                                                                                                                                                              | L/U/H/L  | H/L/H    |   |
| Mandl, 2011     | SLR: 14 (quantitative analysis: 0) | RA patients (n=1307)                                                     | NR                                 | NR           | US to assess synovitis using GS (n=1), PD (n=1) or GS+PD (n=12) using different scoring systems (binary (n=8), semiquantitative (n=14), quantitative (n=2), cumulative score of individual joint scores (n=14))                                                                       | NR   | Clinical (n=13), laboratory (n=13), X-ray (n=3), US (n=1) or MRI (n=6)                                                                                                                                                                                                                                                        | NR                        | NR        |                       | US can be regarded as a valuable tool for globally examining the extent of synovitis in RA. However, it is presently difficult to determine a minimal number of joints to be included in a global US score. Further validation of proposed scores is needed. | Moderate | Moderate | - |
| Ngai ng, 2019*  | Cross-sectional                    | RA patients (n=19)                                                       | DAS28-CRP 4.66, median             | 5.5Y, median | Whole body magnetic resonance imaging: sum-score of 26 joints (28 conventional joints minus elbows), joint inflammation was defined in two ways; 1) as presence of synovitis and/or osteitis, 2) as the presence of synovitis only (28 conventional joints, bilateral ankles, MTP1-5) | NA   | Ultrasound: sum-score of 28 joints (conventional joints; US was graded 0-3 on both B-mode and colour Doppler(CD), and subsequently converted to +/- by defining US synovitis as B mode ≥2 or CD ≥1)                                                                                                                           | NA                        | NR        | r=0.72, p=0.003       |                                                                                                                                                                                                                                                              | L/U/H/U  | H/L/H    |   |
|                 |                                    |                                                                          |                                    |              | Whole body magnetic resonance imaging: sum-score of 26 joints (28 conventional joints minus elbows), joint inflammation was defined as the presence of synovitis (28 conventional joints, bilateral ankles, MTP1-5)                                                                   | NA   | Ultrasound: sum-score of 28 joints (conventional joints; US was graded 0-3 on both B-mode and colour Doppler(CD), and subsequently converted to +/- by defining US synovitis as B mode ≥2 or CD ≥1)                                                                                                                           | NA                        | NR        | r=0.07, p=0.78        |                                                                                                                                                                                                                                                              |          |          |   |
| Schäfer, 2013   | Cross-sectional                    | RA patient (n=18)                                                        | DAS28 4.6 (1.6)                    | 4.9Y         | Fluorescence optical imaging (FOI): Fluorescence readout of indocyanine green in phase 1 (1-120 seconds) of five joints (wrist, MCP2-3, PIP2-3), at patient level                                                                                                                     | >1.2 | MRI of carpal, MCP and PIP joints of dominant hand, at patient level                                                                                                                                                                                                                                                          | Presence/absence (RAMRIS) | Within 2D | 66 (48-80)            | AUC-ROC 0.58                                                                                                                                                                                                                                                 | L/H/H/L  | H/L/L    |   |
|                 |                                    |                                                                          |                                    |              | Fluorescence optical imaging (FOI): Fluorescence readout of indocyanine green in phase 2 (121-240 seconds) of five joints (wrist, MCP2-3, PIP2-3), at patient level                                                                                                                   | >1.2 | MRI of carpal, MCP and PIP joints of dominant hand, at patient level                                                                                                                                                                                                                                                          | Presence/absence (RAMRIS) | Within 2D | 71 (36-92)            | AUC-ROC 0.65                                                                                                                                                                                                                                                 |          |          |   |
|                 |                                    |                                                                          |                                    |              | Fluorescence optical imaging (FOI): Fluorescence readout of indocyanine green in phase 3 (241-360 seconds) of five joints (wrist, MCP2-3, PIP2-3), at patient level                                                                                                                   | >1.2 | MRI of carpal, MCP and PIP joints of dominant hand, at patient level                                                                                                                                                                                                                                                          | Presence/absence (RAMRIS) | Within 2D | 67 (51-79) 77 (62-88) | AUC-ROC 0.67                                                                                                                                                                                                                                                 |          |          |   |
| Vlad, 2011      | Cross-sectional                    | RA patients with at least one painful or clinically swollen joint (n=42) | DAS28 6.15; CDAI 33.90; SDAI 64.23 | 64.64M       | US: Echographic Score, sum of GS scores (0-3) of 10 joints (MCP2-5 dorsal and volar, PIP2-5 dorsal and volar, radiocarpal dorsal and intercarpal joint dorsal) of both hands                                                                                                          | NA   | US: Number of echographically Positive Joints for synovitis of 10 joints (MCP2-5 dorsal and volar, PIP2-5 dorsal and volar, radiocarpal dorsal and intercarpal joint dorsal) of both hands                                                                                                                                    | >0.5 mm                   | Same day  | r=0.935, p<0.001      |                                                                                                                                                                                                                                                              | L/U/H/L  | H/L/H    |   |
|                 |                                    |                                                                          |                                    |              | US: Echographic Score, sum of GS scores (0-3) of 10 joints (MCP2-5 dorsal and volar, PIP2-5 dorsal and volar, radiocarpal dorsal and intercarpal joint dorsal) of both hands                                                                                                          | NA   | US: Number of volar echographically Positive Joints for synovitis of 8 joints (MCP2-5 volar, PIP2-5 volar) of both hands                                                                                                                                                                                                      | >0.5 mm                   | Same day  | r=0.868, p<0.001      |                                                                                                                                                                                                                                                              |          |          |   |

|                |              |                                                                                          |           |                         |                                                                                                                                                                              |    |                                                                                                                                                                                            |                                   |                                |                  |                                          |         |
|----------------|--------------|------------------------------------------------------------------------------------------|-----------|-------------------------|------------------------------------------------------------------------------------------------------------------------------------------------------------------------------|----|--------------------------------------------------------------------------------------------------------------------------------------------------------------------------------------------|-----------------------------------|--------------------------------|------------------|------------------------------------------|---------|
|                |              |                                                                                          |           |                         | US: Echographic Score, sum of GS scores (0-3) of 10 joints (MCP2-5 dorsal and volar, PIP2-5 dorsal and volar, radiocarpal dorsal and intercarpal joint dorsal) of both hands | NA | US: Number of dorsal echographically Positive Joints for synovitis of 10 joints (MCP2-5 dorsal, PIP2-5 dorsal, radiocarpal dorsal and intercarpal joint dorsal) of both hands              | >0.5 mm                           | Same day                       | r=0.848, p<0.001 |                                          |         |
|                |              |                                                                                          |           |                         | US: Volar echographic Score, sum of GS scores (0-3) of 8 joints (MCP2-5 volar, PIP2-5 volar) of both hands                                                                   | NA | US: Number of echographically Positive Joints for synovitis of 10 joints (MCP2-5 dorsal and volar, PIP2-5 dorsal and volar, radiocarpal dorsal and intercarpal joint dorsal) of both hands | >0.5 mm                           | Same day                       | r=0.851, p<0.001 |                                          |         |
|                |              |                                                                                          |           |                         | US: Volar echographic Score, sum of GS scores (0-3) of 8 joints (MCP2-5 volar, PIP2-5 volar) of both hands                                                                   | NA | US: Number of volar echographically Positive Joints for synovitis of 8 joints (MCP2-5 volar, PIP2-5 volar) of both hands                                                                   | >0.5 mm                           | Same day                       | r=0.917, p<0.001 |                                          |         |
|                |              |                                                                                          |           |                         | US: Volar echographic Score, sum of GS scores (0-3) of 8 joints (MCP2-5 volar, PIP2-5 volar) of both hands                                                                   | NA | US: Number of dorsal echographically Positive Joints for synovitis of 10 joints (MCP2-5 dorsal, PIP2-5 dorsal, radiocarpal dorsal and intercarpal joint dorsal) of both hands              | >0.5 mm                           | Same day                       | r=0.653, p<0.001 |                                          |         |
|                |              |                                                                                          |           |                         | US: Dorsal echographic Score, sum of GS scores (0-3) of 10 joints (MCP2-5 dorsal, PIP2-5 dorsal, radiocarpal dorsal and intercarpal joint dorsal) of both hands              | NA | US: Number of echographically Positive Joints for synovitis of 10 joints (MCP2-5 dorsal and volar, PIP2-5 dorsal and volar, radiocarpal dorsal and intercarpal joint dorsal) of both hands | >0.5 mm                           | Same day                       | r=0.859, p<0.001 |                                          |         |
|                |              |                                                                                          |           |                         | US: Dorsal echographic Score, sum of GS scores (0-3) of 10 joints (MCP2-5 dorsal, PIP2-5 dorsal, radiocarpal dorsal and intercarpal joint dorsal) of both hands              | NA | US: Number of volar echographically Positive Joints for synovitis of 8 joints (MCP2-5 volar, PIP2-5 volar) of both hands                                                                   | >0.5 mm                           | Same day                       | r=0.647, p<0.001 |                                          |         |
|                |              |                                                                                          |           |                         | US: Dorsal echographic Score, sum of GS scores (0-3) of 10 joints (MCP2-5 dorsal, PIP2-5 dorsal, radiocarpal dorsal and intercarpal joint dorsal) of both hands              | NA | US: Number of dorsal echographically Positive Joints for synovitis of 10 joints (MCP2-5 dorsal, PIP2-5 dorsal, radiocarpal dorsal and intercarpal joint dorsal) of both hands              | >0.5 mm                           | Same day                       | r=0.923, p<0.001 |                                          |         |
| Van Onna, 2016 | Case control | RA patients in different categories of disease activity: DAS28<2.6, 2.6-5.1, >5.1 (n=59) | DAS28 3.6 | 1-9Y (range of medians) | Optical spectral transmission (OST) in PIP, MCP and wrist joints, at patient level                                                                                           | NA | US: GS and PD in MCP, PIP and wrist joints, at patient level                                                                                                                               | US inflammation: GS>1 and/or PD>0 | Same day (within window of 4h) | r=0.64, p<0.0001 | AUC-ROC 0.81 (95%CI 0.77-0.84, p<0.0001) | L/H/H/L |
|                |              |                                                                                          |           |                         | Optical spectral transmission (OST) in PIP, MCP and wrist joints, at patient level                                                                                           | NA | US: GS in MCP, PIP and wrist joints, at patient level                                                                                                                                      | US inflammation: GS>1 and/or PD>0 | Same day (within window of 4h) | r=0.61, p<0.0001 |                                          |         |
|                |              |                                                                                          |           |                         | Optical spectral transmission (OST) in PIP, MCP and wrist joints, at patient level                                                                                           | NA | US: PD in MCP, PIP and wrist joints, at patient level                                                                                                                                      | US inflammation: GS>1 and/or PD>0 | Same day (within window of 4h) | r=0.62, p<0.0001 |                                          |         |
|                |              |                                                                                          |           |                         | Optical spectral transmission (OST) in PIP, MCP and wrist joints, at patient level                                                                                           | NA | US: GS and PD in MCP, PIP and wrist joints, semi-quantitative score (0-3 per joint), at patient level                                                                                      | NA                                | Same day (within window of 4h) | r=0.60, p<0.0001 |                                          |         |
|                |              |                                                                                          |           |                         | Optical spectral transmission (OST) in PIP, MCP and wrist joints, at patient level                                                                                           | NA | US: GS in MCP, PIP and wrist joints, semi-quantitative score (0-3 per joint), at patient level                                                                                             | NA                                | Same day (within window of 4h) | r=0.57, p<0.0001 |                                          |         |



|                             |                 |                    |                                       |       |                                                                                                                           |    |                                                                                                |    |                                 |                     |         |       |
|-----------------------------|-----------------|--------------------|---------------------------------------|-------|---------------------------------------------------------------------------------------------------------------------------|----|------------------------------------------------------------------------------------------------|----|---------------------------------|---------------------|---------|-------|
| Witt, 2016                  | Cross-sectional | RA patients (n=45) | DAS28 4.1;<br>CDAI 21.2;<br>SDAI 22.5 | NR    | Optical spectral transmission (OST) in PIP, MCP and wrist joints, at patient level                                        | NA | US: PD in MCP, PIP and wrist joints, semi-quantitative score (0-3 per joint), at patient level | NA | Same day (within window of 4h)  | r=0.63,<br>p<0.0001 | L/U/H/U | H/L/L |
|                             |                 |                    |                                       |       | Automated breast volume scanner (The dorsal and palmar sides of each hand and the dorsal aspect of the toes were scanned) | NA | US (wrists, MCP, PIP and MTP joints)                                                           | NA | Same day                        | r=0.79              |         |       |
| <b>Imaging vs histology</b> |                 |                    |                                       |       |                                                                                                                           |    |                                                                                                |    |                                 |                     |         |       |
| Ostendorf, 2001             | Cross-sectional | RA patients (n=22) | DAS 4.15                              | 6.42Y | Miniarthroscopy: Extent of synovitis (2nd MCP joint of dominant hand)                                                     | NA | MRI: Synovial proliferation (MCP2-5 of dominant hand), sum of score 0-3 per joint              | NA | Miniarthroscopy y 24h after MRI | p=0.001             | L/L/H/L | H/L/L |
|                             |                 |                    |                                       |       | Miniarthroscopy: Extent of hyperaemia (2nd MCP joint of dominant hand)                                                    | NA | MRI: Synovial proliferation (MCP2-5 of dominant hand), sum of score 0-3 per joint              | NA | Miniarthroscopy y 24h after MRI | p=0.0038            |         |       |
|                             |                 |                    |                                       |       | Miniarthroscopy: Vascularity (2nd MCP joint of dominant hand)                                                             | NA | MRI: Synovial proliferation (MCP2-5 of dominant hand), sum of score 0-3 per joint              | NA | Miniarthroscopy y 24h after MRI | p=0.0058            |         |       |
|                             |                 |                    |                                       |       | Miniarthroscopy: Synovial thickening (2nd MCP joint of dominant hand)                                                     | NA | MRI: Synovial proliferation (MCP2-5 of dominant hand), sum of score 0-3 per joint              | NA | Miniarthroscopy y 24h after MRI | p=0.0063            |         |       |

ACPA: anti-citrullinated protein antibody; AUC-ROC: area under the curve - receiver operating characteristic; BL: baseline; BMI: body mass index; CDAI: clinical disease activity index; CI: confidence interval; CMC: carpometacarpal; CRP: C-reactive protein; D: days; DAS28: disease activity score assessing 28 joints; DIP: distal interphalangeal; ESR: erythrocyte sedimentation rate; GS: Gray scale; h: hours; H: high; IFN: interferon; IL: interleukin; IP: interphalangeal; IQR: interquartile range; k: kappa agreement; l: liter; L: low; M: months; MBDA: multi-biomarker disease activity score; MCP: metacarpophalangeal; mm: millimeter; MMP: matrix metalloproteinase; MRI: magnetic resonance imaging; MTP: metatarsophalangeal; n: number of patients; NA: not applicable; ng: nanogram; NPV: negative predictive value; NR: not reported; ns: not significant; OR: odds ratio; PD: power doppler; PIP: proximal interphalangeal; PPV: positive predictive value; RA: rheumatoid arthritis; RAPID3: routine assessment of patient index data 3; RAMRIS: rheumatoid arthritis MRI scoring system; RF: rheumatoid factor; s: significant; RoB: risk of bias; SDAI: simplified disease activity index; SIC: swollen joint count; SLR: systematic literature review; STIR: short tau inversion recovery; TIMP: tissue inhibitor of metalloproteinase; TJC: tender joint count; TMT: tarsometatarsal; TNF: tumor necrosis factor; U: unclear; US: ultrasonography; VEGF: vascular endothelial growth factor; W: weeks; Y: years; ^: abstract.

1. Risk of Bias according to QUADAS-2 for individual studies: Patient selection/Index test/Reference standard/Flow and timing; According to AMSTAR2 tool for SLRs: Low=zero or one non-critical weakness; Moderate=more than one non-critical weakness; High=one critical flaw with or without non-critical weaknesses; Critically high=more than one critical flaw with or without non-critical weaknesses; 2. Only applicable for SLRs: Summary of RoB of individual studies, as assessed in SLR Highest risk of bias as found (of individual studies). 3. Concerns regarding applicability for individual studies: Patient selection/Index test/Reference standard.
