# Supplementary material for: Diagnostic issues in difficult-to-treat rheumatoid arthritis: a systematic literature review informing the EULAR recommendations for the management of difficult-to-treat rheumatoid arthritis
Source: PubMed Central journal article supplement — RMD Open. 2021 Jan 29;7(1):e001511. doi: 10.1136/rmdopen-2020-001511 (PMC7849901; doi:10.1136/rmdopen-2020-001511), 2021-01-29
Supplement: rmdopen-2020-001511supp005.pdf [file rmdopen-2020-001511supp005.pdf]

Supplementary table 4. Summary of studies on the assessment of inflammatory activity at joint level

| Studies                               | Study design    | Study population (n)                                                                                                                                                                               | Disease activity (mean)                                                                                              | Disease duration (mean) | Diagnostic test Description                                                                                                              | Cut-off (if applicable) | Reference standard Description                                                                                                                                                                     | Cut-off (if applicable)                                            | Time interval                  | Sensitivity, % (95% CI) | Specificity, % (95% CI) | PPV, % (95% CI) | NPV, % (95% CI) | PPV, % (95% CI) | NPV, % (95% CI) | OR (95% CI, p-value) | Correlation coefficient (95% CI, p-value) | Other                                                     | Risk of bias <sup>1,2</sup> | Risk of bias of individual studies included in | Concerns regarding applicability <sup>3</sup> |
|---------------------------------------|-----------------|----------------------------------------------------------------------------------------------------------------------------------------------------------------------------------------------------|----------------------------------------------------------------------------------------------------------------------|-------------------------|------------------------------------------------------------------------------------------------------------------------------------------|-------------------------|----------------------------------------------------------------------------------------------------------------------------------------------------------------------------------------------------|--------------------------------------------------------------------|--------------------------------|-------------------------|-------------------------|-----------------|-----------------|-----------------|-----------------|----------------------|-------------------------------------------|-----------------------------------------------------------|-----------------------------|------------------------------------------------|-----------------------------------------------|
| <b>Imaging vs clinical assessment</b> |                 |                                                                                                                                                                                                    |                                                                                                                      |                         |                                                                                                                                          |                         |                                                                                                                                                                                                    |                                                                    |                                |                         |                         |                 |                 |                 |                 |                      |                                           |                                                           |                             |                                                |                                               |
| Agrawal, 2009                         | Cross-sectional | RA patients who had undergone US (n=165)                                                                                                                                                           | NR                                                                                                                   | NR                      | Musculoskeletal US per joint                                                                                                             | NR                      | Clinical diagnosis per joint                                                                                                                                                                       | Mutual agreement of 2 rheumatologists                              | Same time point                |                         |                         |                 |                 |                 |                 |                      |                                           | Treatment influenced on the basis of MSUS findings: 51.7% | H/H/U/L                     |                                                | H/L/H                                         |
| Besselink, 2018                       | Cross-sectional | RA patients (n=50)                                                                                                                                                                                 | DAS28-ESR 3.9 (1.20)                                                                                                 | NR                      | Optical spectral transmission (OST) model (separately per joint, for joints of both hands together)                                      | k 0.30                  | Clinically swollen joints                                                                                                                                                                          | positive/negative per joint, for all joints of both hands together | Same day                       |                         |                         |                 |                 | 46 (39-52)      | 86 (84-88)      |                      |                                           |                                                           | H/L/H/L                     |                                                | H/L/L                                         |
|                                       |                 |                                                                                                                                                                                                    |                                                                                                                      |                         | Optical spectral transmission (OST) model (separately per joint, for joints of both hands together)                                      | k 0.24                  | Clinically tender joints                                                                                                                                                                           | positive/negative per joint, for all joints of both hands together | Same day                       |                         |                         |                 |                 | 50 (44-57)      | 78 (76-81)      |                      |                                           |                                                           |                             |                                                | H/H/H/L                                       |
| Meier, 2012                           | Cross-sectional | RA patients (n=67)                                                                                                                                                                                 | NR                                                                                                                   | NR                      | Optical spectral transmission measure of the PIP joint with the highest level of inflammation (mostly 1/patient, sometimes 2), per joint | NA                      | Clinical diagnosis of joint inflammation of PIP joint with the highest level of inflammation (mostly 1/patient, sometimes 2), score 1-5, per joint                                                 | NA                                                                 | NR                             |                         | 88                      |                 |                 |                 |                 |                      | r=0.63 (0.47-0.75, p<0.0001)              |                                                           | L/U/H/U                     |                                                | H/L/H                                         |
| Van Onna, 2016                        | Case control    | RA patients in different categories of disease activity: DAS28<2.6, 2.6-5.1, >5.1 (n=59)                                                                                                           | DAS28 3.6                                                                                                            | 1-9Y (range of medians) | Optical spectral transmission (OST) in PIP joints, at joint level                                                                        | 0.11                    | Clinically swollen PIP joints, per joint                                                                                                                                                           | Presence/absence                                                   | Same day (within window of 4h) | 59                      | 86                      |                 |                 |                 |                 |                      |                                           |                                                           | L/H/L/L                     |                                                | H/L/L                                         |
|                                       |                 |                                                                                                                                                                                                    |                                                                                                                      |                         | Optical spectral transmission (OST) in MCP joints, at joint level                                                                        | 0.26                    | Clinically swollen wrist joints, per joint                                                                                                                                                         | Presence/absence                                                   | Same day (within window of 4h) | 42                      | 93                      |                 |                 |                 |                 |                      |                                           |                                                           |                             |                                                |                                               |
|                                       |                 |                                                                                                                                                                                                    |                                                                                                                      |                         | Optical spectral transmission (OST) in wrist joints, at joint level                                                                      | 1.0                     | Clinically swollen MCP joints, per joint                                                                                                                                                           | Presence/absence                                                   | Same day (within window of 4h) | 37                      | 89                      |                 |                 |                 |                 |                      |                                           |                                                           |                             |                                                |                                               |
| <b>Clinical assessment vs imaging</b> |                 |                                                                                                                                                                                                    |                                                                                                                      |                         |                                                                                                                                          |                         |                                                                                                                                                                                                    |                                                                    |                                |                         |                         |                 |                 |                 |                 |                      |                                           |                                                           |                             |                                                |                                               |
| Inamo, 2018 <sup>a</sup>              | Cross-sectional | RA patients who underwent both physical examination and ultrasonography (n=61)                                                                                                                     | DAS28 4.0 vs 2.4, p<0.05 (patients with joint swelling in feet and ankles vs those without, by physical examination) | 7.1Y                    | Swollen joints by physical examination per joint                                                                                         | NA                      | US: synovitis per joint                                                                                                                                                                            | NA                                                                 | NR                             |                         |                         |                 |                 |                 | 40              |                      |                                           |                                                           | L/U/H/U                     |                                                | H/L/L                                         |
| Krabbe, 2016 <sup>a</sup>             | Cross-sectional | RA patients (n=62)                                                                                                                                                                                 | DAS28 3.6, median                                                                                                    | NR                      | Swelling of wrists, MCP1-5, (P)IP1-5 of both hands, per joint                                                                            | Present/absent          | US: Colour doppler of wrists, MCP1-5, (P)IP1-5 of both hands, score 0-3, per joint                                                                                                                 | ≥1                                                                 | NR                             | 41                      | 93                      |                 |                 |                 |                 |                      |                                           | k 0.35                                                    | L/U/H/U                     |                                                | H/L/L                                         |
|                                       |                 |                                                                                                                                                                                                    |                                                                                                                      |                         | Tenderness of wrists, MCP1-5, (P)IP1-5 of both hands, per joint                                                                          | Present/absent          | US: Colour doppler of wrists, MCP1-5, (P)IP1-5 of both hands, score 0-3, per joint                                                                                                                 | ≥1                                                                 | NR                             | 34                      | 91                      |                 |                 |                 |                 |                      |                                           |                                                           |                             | k 0.25                                         |                                               |
| Matteson, 2009                        | Cross-sectional | RA patients (n=40)                                                                                                                                                                                 | NR                                                                                                                   | NR                      | SJC66, per joint                                                                                                                         | NR                      | FolateScan (Technetium-99m EC20; 99mTc-EC20). EC20 is a folate-targeted diagnostic radiopharmaceutical which binds to the folate receptor and is preferentially taken up by activated macrophages. | NR                                                                 | NR                             | 47                      | 85                      |                 |                 | 21              | 95              |                      |                                           | Accuracy 82%                                              | L/U/H/U                     |                                                | H/L/L                                         |
|                                       |                 |                                                                                                                                                                                                    |                                                                                                                      |                         | TJC66, per joint                                                                                                                         | NR                      | FolateScan (Technetium-99m EC20; 99mTc-EC20). EC20 is a folate-targeted diagnostic radiopharmaceutical which binds to the folate receptor and is preferentially taken up by activated macrophages. | NR                                                                 | NR                             | 36                      | 85                      |                 |                 | 22              | 92              |                      |                                           | Accuracy 80%                                              |                             |                                                |                                               |
|                                       |                 |                                                                                                                                                                                                    |                                                                                                                      |                         | SJC/TJC66 according to rheumatologist, per joint                                                                                         | NR                      | FolateScan (Technetium-99m EC20; 99mTc-EC20). EC20 is a folate-targeted diagnostic radiopharmaceutical which binds to the folate receptor and is preferentially taken up by activated macrophages. | NR                                                                 | NR                             | 40 (26-55)              | 86 (82-90)              |                 |                 | 32 (21-43)      | 90 (85-95)      |                      |                                           | Accuracy 80% (95%CI 75-84)                                |                             |                                                |                                               |
|                                       |                 |                                                                                                                                                                                                    |                                                                                                                      |                         | SJC28, per joint                                                                                                                         | NR                      | FolateScan (Technetium-99m EC20; 99mTc-EC20). EC20 is a folate-targeted diagnostic radiopharmaceutical which binds to the folate receptor and is preferentially taken up by activated macrophages. | NR                                                                 | NR                             | 46                      | 79                      |                 |                 | 26              | 90              |                      |                                           | Accuracy 74%                                              |                             |                                                |                                               |
| TJC28, per joint                      | NR              | FolateScan (Technetium-99m EC20; 99mTc-EC20). EC20 is a folate-targeted diagnostic radiopharmaceutical which binds to the folate receptor and is preferentially taken up by activated macrophages. | NR                                                                                                                   | NR                      | 38                                                                                                                                       | 78                      |                                                                                                                                                                                                    |                                                                    | 22                             | 88                      |                         |                 | Accuracy 72%    |                 |                 |                      |                                           |                                                           |                             |                                                |                                               |

| SJC/TJC28, per joint        |                 | NR                 | FolateScan (Technetium-99m EC20; 99mTc-EC20). EC20 is a folate-targeted diagnostic radiopharmaceutical which binds to the folate receptor and is preferentially taken up by activated macrophages. | NR | NR    | 42 | 80                          | 35 | 84       | Accuracy 72%               |         |       |
|-----------------------------|-----------------|--------------------|----------------------------------------------------------------------------------------------------------------------------------------------------------------------------------------------------|----|-------|----|-----------------------------|----|----------|----------------------------|---------|-------|
| <b>Biomarker vs imaging</b> |                 |                    |                                                                                                                                                                                                    |    |       |    |                             |    |          |                            |         |       |
| do Prado, 2016              | Cross-sectional | RA patients (n=64) | DAS28-ESR 4.02                                                                                                                                                                                     | 5Y | IL-2  | NA | US: PD of right wrist (0-3) | NA | Same day | r=0.17 (-0.07-0.40), ns    | L/L/H/L | H/L/L |
|                             |                 |                    |                                                                                                                                                                                                    |    | IL-2  | NA | US: PD of left wrist (0-3)  | NA | Same day | r=0.05 (-0.21-0.32), ns    |         |       |
|                             |                 |                    |                                                                                                                                                                                                    |    | IL-2  | NA | US: GS of right wrist (0-3) | NA | Same day | r=0.22 (-0.01-0.49), ns    |         |       |
|                             |                 |                    |                                                                                                                                                                                                    |    | IL-2  | NA | US: GS of left wrist (0-3)  | NA | Same day | r=0.05 (-0.20-0.30), ns    |         |       |
|                             |                 |                    |                                                                                                                                                                                                    |    | IL-4  | NA | US: PD of right wrist (0-3) | NA | Same day | r=0.26 (0.01-0.48), ns     |         |       |
|                             |                 |                    |                                                                                                                                                                                                    |    | IL-4  | NA | US: PD of left wrist (0-3)  | NA | Same day | r=0.20 (-0.58-0.46), ns    |         |       |
|                             |                 |                    |                                                                                                                                                                                                    |    | IL-4  | NA | US: GS of right wrist (0-3) | NA | Same day | r=0.29 (0.05-0.54), p<0.05 |         |       |
|                             |                 |                    |                                                                                                                                                                                                    |    | IL-4  | NA | US: GS of left wrist (0-3)  | NA | Same day | r=0.15 (-0.11-0.39), ns    |         |       |
|                             |                 |                    |                                                                                                                                                                                                    |    | IL-6  | NA | US: PD of right wrist (0-3) | NA | Same day | r=0.34 (0.11-0.54), p<0.01 |         |       |
|                             |                 |                    |                                                                                                                                                                                                    |    | IL-6  | NA | US: PD of left wrist (0-3)  | NA | Same day | r=0.45 (0.21-0.64), p<0.01 |         |       |
|                             |                 |                    |                                                                                                                                                                                                    |    | IL-6  | NA | US: GS of right wrist (0-3) | NA | Same day | r=0.40 (0.20-0.59), p<0.01 |         |       |
|                             |                 |                    |                                                                                                                                                                                                    |    | IL-6  | NA | US: GS of left wrist (0-3)  | NA | Same day | r=0.35 (0.08-0.57), p<0.01 |         |       |
|                             |                 |                    |                                                                                                                                                                                                    |    | IL-10 | NA | US: PD of right wrist (0-3) | NA | Same day | r=0.19 (-0.05-0.43), ns    |         |       |
|                             |                 |                    |                                                                                                                                                                                                    |    | IL-10 | NA | US: PD of left wrist (0-3)  | NA | Same day | r=0.12 (-0.11-0.34), ns    |         |       |
|                             |                 |                    |                                                                                                                                                                                                    |    | IL-10 | NA | US: GS of right wrist (0-3) | NA | Same day | r=0.17 (-0.12-0.43), ns    |         |       |
|                             |                 |                    |                                                                                                                                                                                                    |    | IL-10 | NA | US: GS of left wrist (0-3)  | NA | Same day | r=0.06 (-0.17-0.28), ns    |         |       |
|                             |                 |                    |                                                                                                                                                                                                    |    | IL-17 | NA | US: PD of right wrist (0-3) | NA | Same day | r=0.16 (-0.13-0.41), ns    |         |       |
|                             |                 |                    |                                                                                                                                                                                                    |    | IL-17 | NA | US: PD of left wrist (0-3)  | NA | Same day | r=0.18 (-0.10-0.44), ns    |         |       |
|                             |                 |                    |                                                                                                                                                                                                    |    | IL-17 | NA | US: GS of right wrist (0-3) | NA | Same day | r=0.14 (-0.10-0.38), ns    |         |       |
|                             |                 |                    |                                                                                                                                                                                                    |    | IL-17 | NA | US: GS of left wrist (0-3)  | NA | Same day | r=0.12 (-0.12-0.34), ns    |         |       |
|                             |                 |                    |                                                                                                                                                                                                    |    | TNF   | NA | US: PD of right wrist (0-3) | NA | Same day | r=0.23 (-0.02-0.47), ns    |         |       |
|                             |                 |                    |                                                                                                                                                                                                    |    | TNF   | NA | US: PD of left wrist (0-3)  | NA | Same day | r=-0.03 (-0.31-0.23), ns   |         |       |
|                             |                 |                    |                                                                                                                                                                                                    |    | TNF   | NA | US: GS of right wrist (0-3) | NA | Same day | r=0.17 (-0.08-0.43), ns    |         |       |
|                             |                 |                    |                                                                                                                                                                                                    |    | TNF   | NA | US: GS of left wrist (0-3)  | NA | Same day | r=0.002 (-0.25-0.25), ns   |         |       |
|                             |                 |                    |                                                                                                                                                                                                    |    | IFN   | NA | US: PD of right wrist (0-3) | NA | Same day | r=-0.10 (-0.34-0.14), ns   |         |       |
|                             |                 |                    |                                                                                                                                                                                                    |    | IFN   | NA | US: PD of left wrist (0-3)  | NA | Same day | r=0.06 (-0.18-0.31), ns    |         |       |
|                             |                 |                    |                                                                                                                                                                                                    |    | IFN   | NA | US: GS of right wrist (0-3) | NA | Same day | r=0.02 (-0.26-0.29), ns    |         |       |
|                             |                 |                    |                                                                                                                                                                                                    |    | IFN   | NA | US: GS of left wrist (0-3)  | NA | Same day | r=0.03 (-0.24-0.29), ns    |         |       |
|                             |                 |                    |                                                                                                                                                                                                    |    | VEGF  | NA | US: PD of right wrist (0-3) | NA | Same day | r=0.04 (-0.20-0.26), ns    |         |       |
|                             |                 |                    |                                                                                                                                                                                                    |    | VEGF  | NA | US: PD of left wrist (0-3)  | NA | Same day | r=-0.05 (-0.29-0.20), ns   |         |       |

|                           |                 |                                       |                        |              |                                                                                                                                                                                                                                                            |                     |                                                                                                                                                                                                                            |                                                                    |                                                                         |            |            |            |            |                                       |         |                                         |         |       |
|---------------------------|-----------------|---------------------------------------|------------------------|--------------|------------------------------------------------------------------------------------------------------------------------------------------------------------------------------------------------------------------------------------------------------------|---------------------|----------------------------------------------------------------------------------------------------------------------------------------------------------------------------------------------------------------------------|--------------------------------------------------------------------|-------------------------------------------------------------------------|------------|------------|------------|------------|---------------------------------------|---------|-----------------------------------------|---------|-------|
|                           |                 |                                       |                        |              | VEGF                                                                                                                                                                                                                                                       | NA                  | US: GS of right wrist (0-3)                                                                                                                                                                                                | NA                                                                 | Same day                                                                |            |            |            |            | $r=0$ (-0.26-0.23), ns                |         |                                         |         |       |
|                           |                 |                                       |                        |              | VEGF                                                                                                                                                                                                                                                       | NA                  | US: GS of left wrist (0-3)                                                                                                                                                                                                 | NA                                                                 | Same day                                                                |            |            |            |            | $r=-0.1$ (-0.35-0.14), ns             |         |                                         |         |       |
| <b>Imaging vs imaging</b> |                 |                                       |                        |              |                                                                                                                                                                                                                                                            |                     |                                                                                                                                                                                                                            |                                                                    |                                                                         |            |            |            |            |                                       |         |                                         |         |       |
| Abdelzaher, 2019          | Cross-sectional | RA patients with shoulder pain (n=30) | DAS28-ESR 4.41         | 54M, median  | Biceps tenosynovitis on US                                                                                                                                                                                                                                 | NR                  | Biceps tenosynovitis on MRI                                                                                                                                                                                                | NR                                                                 | Same day                                                                | 87.5       | 97.6       | 93.3       | 95.3       |                                       | L/L/H/L | H/L/L                                   |         |       |
| Amital, 2015              | Case control    | RA patients (n=38)                    | DAS28 4.3 (1.7)        | NR           | Subscapularis tenosynovitis on US<br>Lightscan (photo optical imaging) per joint                                                                                                                                                                           | NR<br>Mean sum 1.31 | Subscapularis tenosynovitis on MRI<br>Musculoskeletal ultrasonography (synovitis and tenosynovitis) per joint                                                                                                              | NR                                                                 | Same day<br>Same day                                                    | 91.7<br>74 | 97.8<br>93 | 91.7       | 97.8       |                                       | L/H/H/L | H/L/H                                   |         |       |
| Besselink, 2018           | Cross-sectional | RA patients (n=50)                    | DAS28-ESR 3.9 (1.20)   | NR           | Optical spectral transmission (OST) model (separately per joint, for joints of both hands together)                                                                                                                                                        | k 0.47              | US (wrists and, in the hands, MCPs 1B-5, PIPs 2B-5 and IP 1)                                                                                                                                                               | positive/negative per joint, for all joints of both hands together | Same day                                                                |            |            | 60 (53-67) | 89 (86-91) | $r=0.54$ (95%CI 0.28-0.73, $p<0.01$ ) | L/H/L/L | H/L/L                                   |         |       |
| Boesen, 2012              | Cross-sectional | RA patients (n=50)                    | DAS28 4.8              | 87.2M        | US: Colour fraction calculation out of colour Doppler of one wrist joint                                                                                                                                                                                   | NA                  | MRI with gadolinium injection of the wrist: total RAMRIS synovitis score                                                                                                                                                   | NA                                                                 | Same day (within a 2 hour interval)                                     |            |            |            |            | $r=0.42$ , $p<0.006$                  | L/L/H/L | H/L/L                                   |         |       |
|                           |                 |                                       |                        |              | US: Colour fraction calculation out of colour Doppler of one wrist joint                                                                                                                                                                                   | NA                  | MRI with gadolinium injection of the wrist: MRI synovitis radiocarpal joint score                                                                                                                                          | NA                                                                 | Same day (within a 2 hour interval)                                     |            |            |            |            | $r=0.43$ , $p<0.005$                  |         |                                         |         |       |
|                           |                 |                                       |                        |              | US: Colour fraction calculation out of colour Doppler of one wrist joint                                                                                                                                                                                   | NA                  | MRI with gadolinium injection of the wrist: Average MRI thickness synovitis in the radiocarpal joint                                                                                                                       | NA                                                                 | Same day (within a 2 hour interval)                                     |            |            |            |            | $r=0.296$ , $p=0.06$                  |         |                                         |         |       |
| Hermann, 2003             | Cross-sectional | RA patients with shoulder pain (n=43) | NR                     | 6.8Y         | Contrast-enhanced MRI: synovitis of the glenohumeral joint                                                                                                                                                                                                 | NA                  | US: synovitis of the shoulder                                                                                                                                                                                              | NA                                                                 | Same day (not all patients could undergo the MRI on the same day as US) | 92         | 48         | 41%        | 94%        | 41                                    | 94      | $k 0.29$ (95%CI 0.08-0.50, $p=0.0318$ ) | L/L/H/L | H/L/L |
| Kawashiri, 2015           | Cross-sectional | RA patients (n=14)                    | DAS28-ESR 5.81         | 30M, median  | Automated Breast Volume Scanner of bilateral wrists, per joint                                                                                                                                                                                             | NA                  | US: Gray scale of bilateral wrists, score 0-3, per joint                                                                                                                                                                   | NA                                                                 | Same day                                                                |            |            |            |            | $k 0.79$                              | L/L/H/L | H/L/L                                   |         |       |
|                           |                 |                                       |                        |              | Automated Breast Volume Scanner of MCP1-5 of both hands, per joint                                                                                                                                                                                         | NA                  | US: Gray scale of MCP1-5 of both hands, score 0-3, per joint                                                                                                                                                               | NA                                                                 | Same day                                                                |            |            |            |            | $k 0.60$                              |         |                                         |         |       |
|                           |                 |                                       |                        |              | Automated Breast Volume Scanner of bilateral wrists, per joint                                                                                                                                                                                             | NA                  | US: Gray scale of bilateral wrists, score 0-3, per joint                                                                                                                                                                   | $\geq 2$                                                           | Same day                                                                |            |            |            |            | $k 1.00$                              |         |                                         |         |       |
|                           |                 |                                       |                        |              | Automated Breast Volume Scanner of MCP1-5 of both hands, per joint                                                                                                                                                                                         | NA                  | US: Gray scale of MCP1-5 of both hands, score 0-3, per joint                                                                                                                                                               | $\geq 2$                                                           | Same day                                                                |            |            |            |            | $k 0.92$                              |         |                                         |         |       |
| Krabbe, 2016*             | Cross-sectional | RA patients (n=62)                    | DAS28 3.6, median      | NR           | Optical spectral transmission imaging of wrists, MCP1-5, (P)IP1-5 of both hands, per joint                                                                                                                                                                 | $>0.521$            | US: Colour doppler of wrists, MCP1-5, (P)IP1-5 of both hands, score 0-3, per joint                                                                                                                                         | $\geq 1$                                                           | NR                                                                      | 54         | 79         | 27         | 93         | $k 0.23$ ; AUC-ROC 0.69, $p<0.001$    | L/U/H/U | H/L/L                                   |         |       |
|                           |                 |                                       |                        |              | Optical spectral transmission imaging of wrists, MCP1-5, (P)IP1-5 of both hands, per joint                                                                                                                                                                 | $>0.521$            | US: Colour doppler of wrists, MCP1-5, (P)IP1-5 of both hands, score 0-3, per joint                                                                                                                                         | $\geq 2$                                                           | NR                                                                      |            |            |            |            | AUC-ROC 0.71                          |         |                                         |         |       |
|                           |                 |                                       |                        |              | Optical spectral transmission imaging of wrists, MCP1-5, (P)IP1-5 of both hands, per joint                                                                                                                                                                 | $>0.521$            | US: Colour doppler OR GS of wrists, MCP1-5, (P)IP1-5 of both hands, score 0-3, per joint                                                                                                                                   | $\geq 2$                                                           | NR                                                                      |            |            |            |            | AUC-ROC 0.70                          |         |                                         |         |       |
|                           |                 |                                       |                        |              | Optical spectral transmission imaging of wrists, MCP1-5, (P)IP1-5 of both hands, per joint                                                                                                                                                                 | $>0.521$            | US: Colour doppler OR GS of wrists, MCP1-5, (P)IP1-5 of both hands, score 0-3, per joint                                                                                                                                   | $\geq 1$                                                           | NR                                                                      |            |            |            |            | AUC-ROC 0.65                          |         |                                         |         |       |
|                           |                 |                                       |                        |              | Optical spectral transmission imaging of (P)IP1-5 of both hands, per joint                                                                                                                                                                                 | $>0.521$            | US: Colour doppler of (P)IP1-5 of both hands, score 0-3, per joint                                                                                                                                                         | $\geq 1$                                                           | NR                                                                      | 29         | 89         |            |            | $k 0.12$ ; AUC-ROC 0.71, $p=0.001$    |         |                                         |         |       |
|                           |                 |                                       |                        |              | Optical spectral transmission imaging of MCP1-5 of both hands, per joint                                                                                                                                                                                   | $>0.521$            | US: Colour doppler of MCP1-5 of both hands, score 0-3, per joint                                                                                                                                                           | $\geq 1$                                                           | NR                                                                      | 44         | 75         |            |            | $k 0.15$ ; AUC-ROC 0.60, $p=0.003$    |         |                                         |         |       |
|                           |                 |                                       |                        |              | Optical spectral transmission imaging of wrists of both hands, per joint                                                                                                                                                                                   | $>0.521$            | US: Colour doppler of wrists of both hands, score 0-3, per joint                                                                                                                                                           | $\geq 1$                                                           | NR                                                                      | 91         | 24         |            |            | $k 0.09$ ; AUC-ROC 0.58, ns           |         |                                         |         |       |
| Ngai ng, 2019*            | Cross-sectional | RA patients (n=19)                    | DAS28-CRP 4.66, median | 5.5Y, median | Whole body magnetic resonance imaging: per joint, wrists/MCP2/MCP5/PIPs, joint inflammation was defined in two ways; 1) as presence of synovitis and/or osteitis, 2) as the presence of syn-ovitis only (28 conventional joints, bilateral ankles, MTP1-5) | NA                  | Ultrasound: per joint, wrists/MCP2/MCP5/PIPs (conventional joints: US was graded 0-3 on both B-mode and colour Doppler(CD), and subsequently converted to +/- by defining US synovitis as B mode $\geq 2$ or CD $\geq 1$ ) | NA                                                                 | NR                                                                      |            |            |            |            | $k=0.42-0.62$                         | L/U/H/U | H/L/H                                   |         |       |
|                           |                 |                                       |                        |              | Whole body magnetic resonance imaging: per joint, other joints, joint inflammation was defined in two ways; 1) as presence of synovitis and/or osteitis, 2) as the presence of syn-ovitis only (28 conventional joints, bilateral ankles, MTP1-5)          | NA                  | Ultrasound: per joint, other joints; US was graded 0-3 on both B-mode and colour Doppler(CD), and subsequently converted to +/- by defining US synovitis as B mode $\geq 2$ or CD $\geq 1$ )                               | NA                                                                 | NR                                                                      |            |            |            |            | $k \leq 0.37$                         |         |                                         |         |       |

|                             |                 |                                                                                          |                 |                         |                                                                                                                                                                                         |                                              |                                                                                                                                                                                                               |                                                         |                    |                  |                  |                                          |                                                                                                                                                                                                                         |          |                                  |
|-----------------------------|-----------------|------------------------------------------------------------------------------------------|-----------------|-------------------------|-----------------------------------------------------------------------------------------------------------------------------------------------------------------------------------------|----------------------------------------------|---------------------------------------------------------------------------------------------------------------------------------------------------------------------------------------------------------------|---------------------------------------------------------|--------------------|------------------|------------------|------------------------------------------|-------------------------------------------------------------------------------------------------------------------------------------------------------------------------------------------------------------------------|----------|----------------------------------|
|                             |                 |                                                                                          |                 |                         | Whole body magnetic resonance imaging: per joint, wrists/MCP2/MCP5/PIP5, joint inflammation was defined as the presence of synovitis (28 conventional joints, bilateral ankles, MTP1-5) | NA                                           | Ultrasound: per joint, wrists/MCP2/MCP5/PIP5 (conventional joints; US was graded 0-3 on both B-mode and colour Doppler(CD), and subsequently converted to +/- by defining US synovitis as B mode ≥2 or CD ≥1) | NA                                                      | NR                 |                  |                  | k=0.42-0.66                              |                                                                                                                                                                                                                         |          |                                  |
|                             |                 |                                                                                          |                 |                         | Whole body magnetic resonance imaging: per joint, other joints, joint inflammation was defined as the presence of synovitis only (28 conventional joints, bilateral ankles, MTP1-5)     | NA                                           | Ultrasound: per joint, other joints; US was graded 0-3 on both B-mode and colour Doppler(CD), and subsequently converted to +/- by defining US synovitis as B mode ≥2 or CD ≥1)                               | NA                                                      | NR                 |                  |                  | k≤0.36                                   |                                                                                                                                                                                                                         |          |                                  |
| Schäfer, 2013               | Cross-sectional | RA patient (n=18)                                                                        | DAS28 4.6 (1.6) | 4.9Y                    | Fluorescence optical imaging (FOI): Fluorescence readout of indocyanine green in phase 3 (241-360 seconds) for carpal joints, at joint level                                            | >1.2                                         | MRI of carpal joint of dominant hand, at joint level                                                                                                                                                          | Presence/absence                                        | Within 2D (RAMRIS) | 87 (62-96)       | 0 (0-56)         |                                          | L/H/H/L                                                                                                                                                                                                                 | H/L/L    |                                  |
|                             |                 |                                                                                          |                 |                         | Fluorescence optical imaging (FOI): Fluorescence readout of indocyanine green in phase 3 (241-360 seconds) for MCP joints, at joint level                                               | >1.2                                         | MRI of MCP joints of dominant hand, at joint level                                                                                                                                                            | Presence/absence                                        | Within 2D (RAMRIS) | 42 (23-62)       | 92 (70-99)       |                                          |                                                                                                                                                                                                                         |          |                                  |
|                             |                 |                                                                                          |                 |                         | Fluorescence optical imaging (FOI): Fluorescence readout of indocyanine green in phase 3 (241-360 seconds) for PIP joints, at joint level                                               | >1.2                                         | MRI of PIP joints of dominant hand, at joint level                                                                                                                                                            | Presence/absence                                        | Within 2D (RAMRIS) | 100 (57-100)     | 77 (57-90)       |                                          |                                                                                                                                                                                                                         |          |                                  |
| Scheel, 2005                | Cross-sectional | RA patients (n=13)                                                                       | NR              | 4.3Y                    | Sagittal laser optical tomography of PIP2-4 joints of clinically dominant hand, per joint                                                                                               | Min(ma) = 0.272 cm with Youden index of 0.41 | US of PIP2-4 joints of clinically dominant hand, score 0-3 per joint, per joint                                                                                                                               | >1                                                      | NR                 | 70.5             | 70.5             | AUC-ROC 0.777                            | L/H/H/L                                                                                                                                                                                                                 | H/L/L    |                                  |
|                             |                 |                                                                                          |                 |                         | Sagittal laser optical tomography of PIP2-4 joints of clinically dominant hand, per joint                                                                                               | Min(ma) = 0.41 cm with Youden index of 0.41  | US of PIP2-4 joints of clinically dominant hand, score 0-3 per joint, per joint                                                                                                                               | >1                                                      | NR                 | 73.6             | 67.4             |                                          |                                                                                                                                                                                                                         |          |                                  |
| Van Onna, 2016              | Case control    | RA patients in different categories of disease activity: DAS28<2.6, 2.6-5.1, >5.1 (n=59) | DAS28 3.6       | 1-9Y (range of medians) | Optical spectral transmission (OST) in PIP joints, at joint level                                                                                                                       | 0.11                                         | US: GS and PD in PIP joints, at joint level                                                                                                                                                                   | US inflammation: GS>1 and/or PD>0 (within window of 4h) | Same day           | 83               | 64               | AUC-ROC 0.79 (95%CI 0.72-0.86, p<0.0001) | L/H/H/L                                                                                                                                                                                                                 | H/L/L    |                                  |
|                             |                 |                                                                                          |                 |                         | Optical spectral transmission (OST) in MCP joints, at joint level                                                                                                                       | 0.26                                         | US: GS and PD in MCP joints, at joint level                                                                                                                                                                   | US inflammation: GS>1 and/or PD>0 (within window of 4h) | Same day           | 70               | 74               | AUC-ROC 0.78 (95%CI 0.71-0.83, p<0.0001) |                                                                                                                                                                                                                         |          |                                  |
|                             |                 |                                                                                          |                 |                         | Optical spectral transmission (OST) in wrist joints, at joint level                                                                                                                     | 1.0                                          | US: GS and PD in wrist joints, at joint level                                                                                                                                                                 | US inflammation: GS>1 and/or PD>0 (within window of 4h) | Same day           | 39               | 87               | AUC-ROC 0.62 (95%CI 0.52-0.72, p=0.006)  |                                                                                                                                                                                                                         |          |                                  |
| Takase-Minegishi, 2018      | SLR: 14         | RA patients (n=376)                                                                      | NR              | NR                      | Synovitis of wrist joints on US (in 5 cohorts: including PD, GS, PD+GS), per joint                                                                                                      | Based on judgement by the authors            | Synovitis of wrist joints on MRI (including (non-)enhanced, dynamic, 1.5T, 3T, compact, low-field extremity and 0.2T MRI), per joint                                                                          | Based on judgement by the authors                       | NR                 | 0.73 (0.51-0.87) | 0.78 (0.46-0.94) | 11.6 (5.6-24, -)                         | AUC-ROC 0.81; Overall conclusion: US is a valid and reproducible technique for detecting synovitis in the wrist and finger joints. It may be considered for routine use as part of the standard diagnostic tools in RA. | Moderate | Moderate (1 study with high RoB) |
|                             |                 |                                                                                          |                 |                         | Synovitis of MCP joints on US (in 12 cohorts: including PD, GS, PD+GS), per joint                                                                                                       | Based on judgement by the authors            | Synovitis of MCP joints on MRI (including (non-)enhanced, dynamic, 1.5T, 3T, compact, low-field extremity and 0.2T MRI), per joint                                                                            | Based on judgement by the authors                       | NR                 | 0.64 (0.43-0.81) | 0.93 (0.88-0.97) | 28 (12-66, -)                            | AUR-ROC 0.91                                                                                                                                                                                                            |          |                                  |
|                             |                 |                                                                                          |                 |                         | Synovitis of PIP joints on US (in 6 cohorts: including PD, GS, PD+GS), per joint                                                                                                        | Based on judgement by the authors            | Synovitis of PIP joints on MRI (including (non-)enhanced, dynamic, 1.5T, 3T, compact, low-field extremity and 0.2T MRI), per joint                                                                            | Based on judgement by the authors                       | NR                 | 0.71 (0.33-0.93) | 0.94 (0.89-0.97) | 23 (6.5-84, -)                           | AUR-ROC 0.91                                                                                                                                                                                                            |          |                                  |
|                             |                 |                                                                                          |                 |                         | Synovitis of knee joints on US (in 3 cohorts: including PD, GS, PD+GS), per joint                                                                                                       | Based on judgement by the authors            | Synovitis of knee joints on MRI (including (non-)enhanced, dynamic, 1.5T, 3T, compact, low-field extremity and 0.2T MRI), per joint                                                                           | Based on judgement by the authors                       | NR                 | 0.91 (0.56-0.99) | 0.60 (0.20-0.90) | 5.2 (0.60-48, -)                         | AUR-ROC 0.91                                                                                                                                                                                                            |          |                                  |
| <b>Imaging vs histology</b> |                 |                                                                                          |                 |                         |                                                                                                                                                                                         |                                              |                                                                                                                                                                                                               |                                                         |                    |                  |                  |                                          |                                                                                                                                                                                                                         |          |                                  |
| Fier, 2017*                 | Cross-sectional | RA patients with at least 1 joint amenable to biopsy (n=15)                              | NR              | NR                      | GS US per joint                                                                                                                                                                         | NA                                           | Krenn index of cellular inflammation (histology obtained by synovial biopsy)                                                                                                                                  | NA                                                      | NR                 |                  |                  | r=0.65, p<0.01                           | L/L/H/L                                                                                                                                                                                                                 | H/L/L    |                                  |
|                             |                 |                                                                                          |                 |                         | GS US per joint                                                                                                                                                                         | NA                                           | Krenn lining layer score (histology obtained by synovial biopsy)                                                                                                                                              | NA                                                      | NR                 |                  |                  | r=0.52, p<0.05                           |                                                                                                                                                                                                                         |          |                                  |
|                             |                 |                                                                                          |                 |                         | PD US per joint                                                                                                                                                                         | NA                                           | Krenn index of cellular inflammation (histology obtained by synovial biopsy)                                                                                                                                  | NA                                                      | NR                 |                  |                  | p=0.34                                   |                                                                                                                                                                                                                         |          |                                  |
|                             |                 |                                                                                          |                 |                         | PD US per joint                                                                                                                                                                         | NA                                           | Krenn lining layer score (histology obtained by synovial biopsy)                                                                                                                                              | NA                                                      | NR                 |                  |                  | p=0.48                                   |                                                                                                                                                                                                                         |          |                                  |

ACPA: anti-citrullinated protein antibody; AUC-ROC: area under the curve - receiver operating characteristic; BL: baseline; BMI: body mass index; CDAI: clinical disease activity index; CI: confidence interval; CMC: carpometacarpal; CRP: C-reactive protein; D: days; DAS28: disease activity score assessing 28 joints; DIP: distal interphalangeal; ESR: erythrocyte sedimentation rate; GS: Gray scale; h: hours; H: high; IFN: interferon; IL: interleukin; IP: interphalangeal; IQR: interquartile range; k: kappa agreement; l: liter; L: low; M: months; MBDA: multi-biomarker disease activity score; MCP: metacarpophalangeal; mm: millimeter; MMP: matrix metalloproteinase; MRI: magnetic resonance imaging; MTP: metatarsophalangeal; n: number of patients; NA: not applicable; ng: nanogram; NPV: negative predictive value; NR: not reported; ns: not significant; OR: odds ratio; PD: power doppler; PIP: proximal interphalangeal; PPV: positive predictive value; RA: rheumatoid arthritis; RAPID3: routine assessment of patient index data 3; RAMRIS: rheumatoid arthritis MRI scoring system; RF: rheumatoid factor; s: significant; RoB: risk of bias; SDAI: simplified disease activity index; SIC: swollen joint count; SLR: systematic literature review; STIR: short tau inversion recovery; TIMP: tissue inhibitor of metalloproteinase; TJC: tender joint count; TMT: tarsometatarsal; TNF: tumor necrosis factor; U: unclear; US: ultrasonography; VEGF: vascular endothelial growth factor; W: weeks; Y: years; \*: abstract.

1. Risk of Bias according to QUADAS-2 for individual studies: Patient selection/Index test/Reference standard/Flow and timing; According to AMSTAR2 tool for SLRs: Low=zero or one non-critical weakness; Moderate=more than one non-critical weakness; High=one critical flaw with or without non-critical weaknesses; Critically high=more than one critical flaw with or without non-critical weaknesses; 2. Only applicable for SLRs: Summary of RoB of individual studies, as assessed in SLR Highest risk of bias as found (of individual studies). 3. Concerns regarding applicability for individual studies: Patient selection/Index test/Reference standard.
