# Supplementary material for: Diagnostic issues in difficult-to-treat rheumatoid arthritis: a systematic literature review informing the EULAR recommendations for the management of difficult-to-treat rheumatoid arthritis
Source: PubMed Central journal article supplement — RMD Open. 2021 Jan 29;7(1):e001511. doi: 10.1136/rmdopen-2020-001511 (PMC7849901; doi:10.1136/rmdopen-2020-001511), 2021-01-29
Supplement: rmdopen-2020-001511supp006.pdf [file rmdopen-2020-001511supp006.pdf]

| Study                    | Design          | Population                                             | Intervention   | Comparison | Outcome                                                                                                | Effect Size       | Significance                           | Notes |                                    |                 |                 |                 |            |                                                                                                                                                                                                                      |         |       |
|--------------------------|-----------------|--------------------------------------------------------|----------------|------------|--------------------------------------------------------------------------------------------------------|-------------------|----------------------------------------|-------|------------------------------------|-----------------|-----------------|-----------------|------------|----------------------------------------------------------------------------------------------------------------------------------------------------------------------------------------------------------------------|---------|-------|
| Sosa, 2017 <sup>a</sup>  | Cross-sectional | RA patients without FM (n=95)                          | NR             | NR         | RA patients with FM according to ACR criteria (n=35)                                                   | median (range) NR | CDAI                                   | NA    | PD 7-joint US score                | NA              | Same time point | r=0.37, p<0.05  | r=0.01, ns | Effect of the presence of fibromyalgia on the score difference between traditional and modified composite scores, adjusted by age, sex and nodular disease, mean increment (95%CI, p-value): 1.50 (0.60-2.40, 0.001) | L/L/H/L | L/L/L |
|                          |                 |                                                        |                |            | modifiedDAS28-ESR (excluding TJC and patient's global assessment of disease activity)                  | NA                | DAS28-ESR                              | NA    | Same time point                    |                 |                 |                 |            |                                                                                                                                                                                                                      |         |       |
|                          |                 |                                                        |                |            | modifiedDAS28-CRP (excluding TJC and patient's global assessment of disease activity)                  | NA                | DAS28-CRP                              | NA    | Same time point                    |                 |                 |                 |            |                                                                                                                                                                                                                      |         |       |
|                          |                 |                                                        |                |            | modifiedSDAI (excluding TJC and patient's global assessment of disease activity)                       | NA                | SDAI                                   | NA    | Same time point                    |                 |                 |                 |            |                                                                                                                                                                                                                      |         |       |
| Tamas, 2017 <sup>a</sup> | Cross-sectional | RA patients treated with bDMARDs and without FM (n=30) | DAS28-CRP 3.33 | NR         | RA patients treated with bDMARDs and with FM (according to difference of ≥7 between TJC and SJC) (n=9) | DAS28-CRP 5.13    | SJC                                    | NA    | US: GS synovitis, 7-joint US score | NA              | NR              | r=0.44, p=0.015 | ns         | Effect of the presence of fibromyalgia on the score difference between traditional and modified composite scores, adjusted by age, sex and nodular disease, mean increment (95%CI, p-value): 1.55 (0.63-2.48, 0.001) | L/L/U/U | H/L/L |
|                          |                 |                                                        |                |            | SJC                                                                                                    | NA                | US: PD synovitis, 7-joint US score     | NA    | NR                                 | r=0.47, p=0.008 |                 |                 |            |                                                                                                                                                                                                                      |         |       |
|                          |                 |                                                        |                |            | SJC                                                                                                    | NA                | US: GS tenosynovitis, 7-joint US score | NA    | NR                                 | r=0.57, p=0.001 |                 |                 |            |                                                                                                                                                                                                                      |         |       |
|                          |                 |                                                        |                |            | SJC                                                                                                    | NA                | US: PD tenosynovitis, 7-joint US score | NA    | NR                                 | r=0.46, p=0.011 |                 |                 |            |                                                                                                                                                                                                                      |         |       |

ACR: American college of rheumatology; bDMARDs: biologic disease modifying anti-rheumatic drugs; BMI: body mass index; CDAI: clinical disease activity index; CI: confidence interval; CRP: C-reactive protein; DAS28: disease activity score assessing 28 joints; FM: fibromyalgia; GS: Gray scale; H: high; L: low; MBDA: multi-biomarker disease activity; MCP: metacarpophalangeal; MTP: metatarsophalangeal; n: number of patients; NA: not applicable; NPV: negative predictive value; NR: not reported; ns: not significant; OR: odds ratio; PD: power doppler; PIP: proximal interphalangeal; PPV: positive predictive value; RA: rheumatoid arthritis; SDAI: simplified disease activity index; SJC: swollen joint count; TJC: tender joint count; U: unclear; US: ultrasonography; Y: years

<sup>a</sup>: Conference abstract  
 1. According to QUADAS-2, assessing 4 domains: Patient selection/Index test(s)/Reference standard/Flow and timing; 2. According to QUADAS-2, assessing 3 domains: Patient selection/Index test(s)/Reference standard; \*According to AMSTAR-2, highest category as found
